# Supplementary material
Source: PubMed Central journal article supplement (PMC5649166)
Supplement: ismej2017110x1.pdf [file ismej2017110x1.pdf]

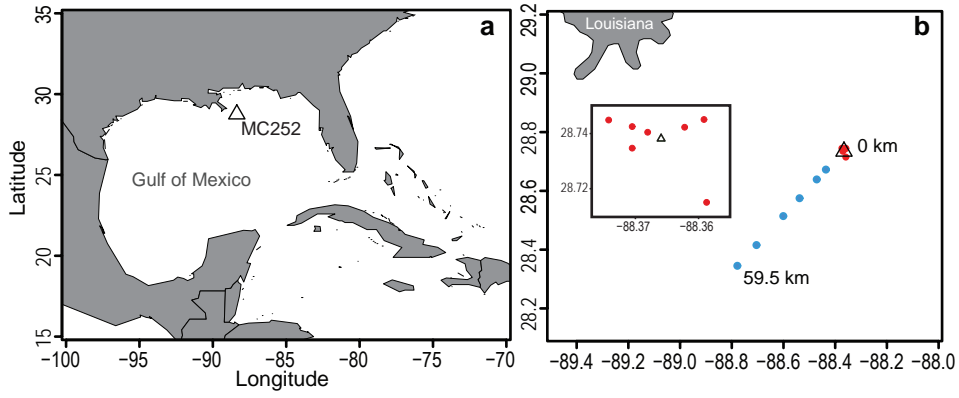

**Figure S1.** (a) Location of well MC252, and (b) sampling locations. Samples >3 km from MC252 are shown in blue, while near-well samples are shown in red (inset).

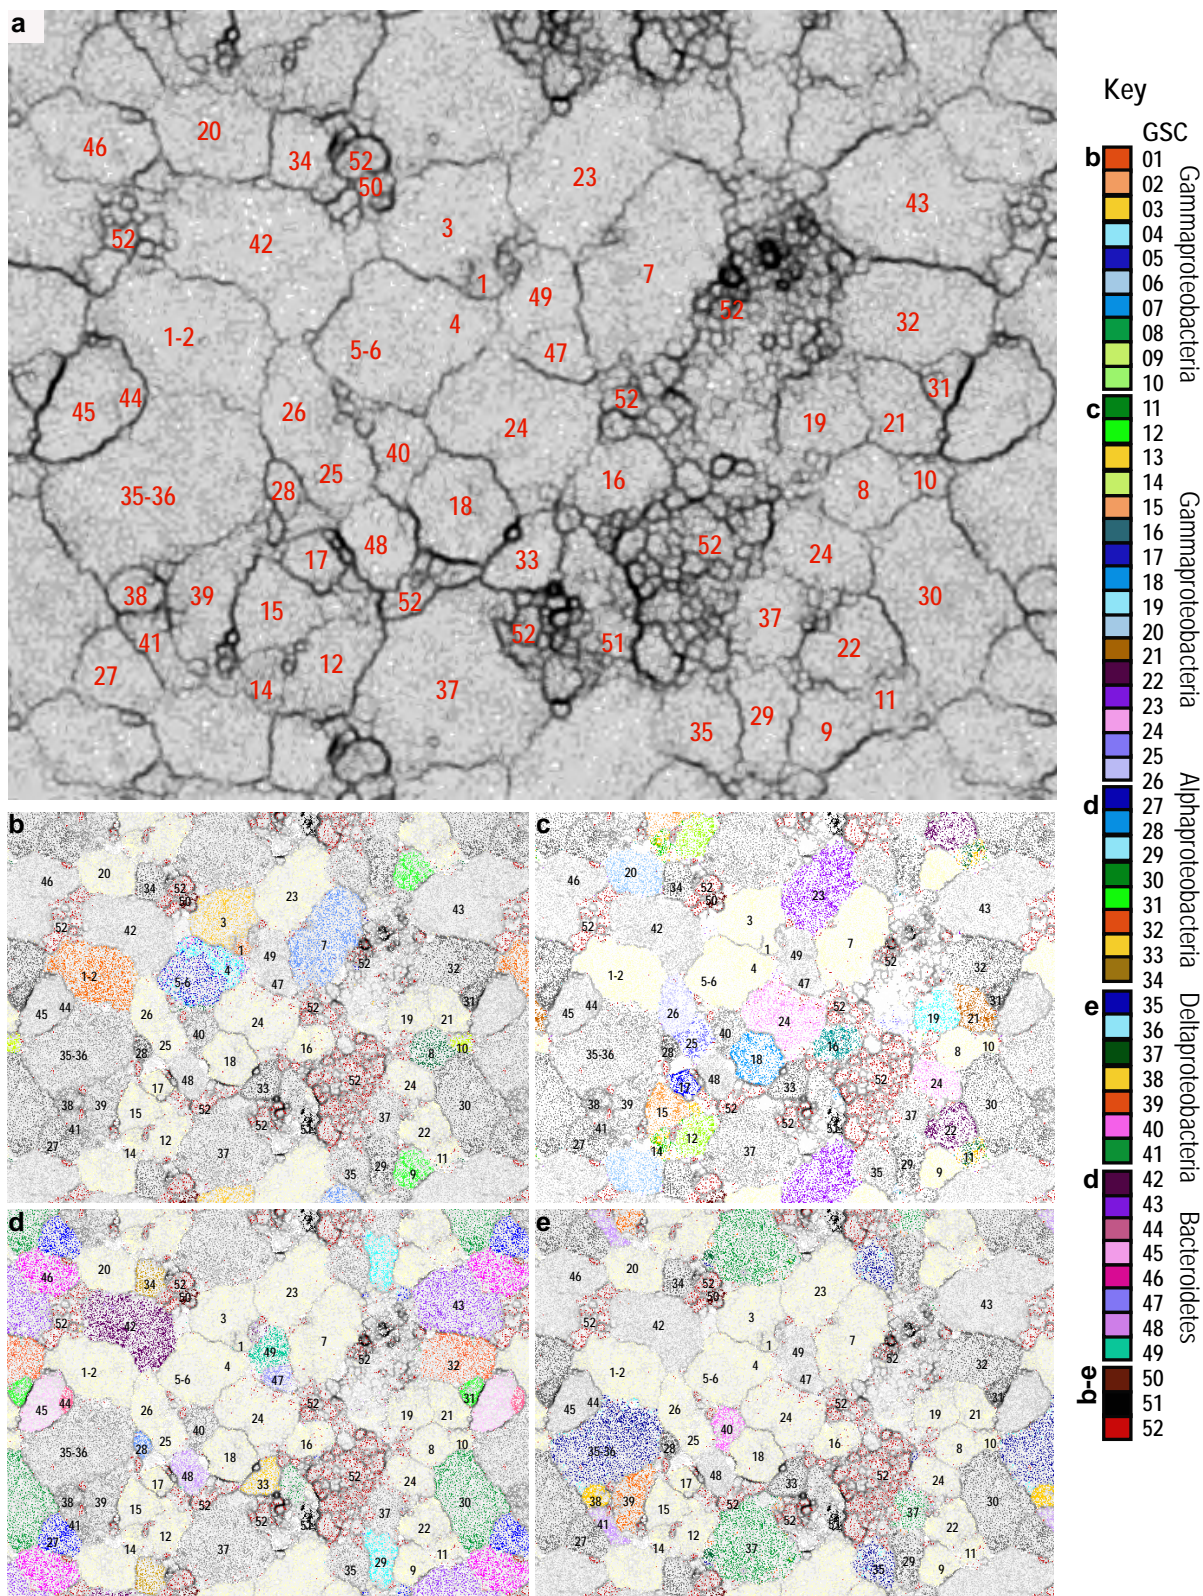

**Figure S2.** (a) ESOM of co-assembly constructed using tetranucleotide frequencies of 5 kbp long genomic fragments and differential coverage. Bin (GSC) numbers are shown in red. Dark lines demark cluster edges. Collections of small clusters are contigs containing virus-associated genes. (b-e) ESOM with data points representing 2 kbp long genomic fragments and colored by bin (see key).

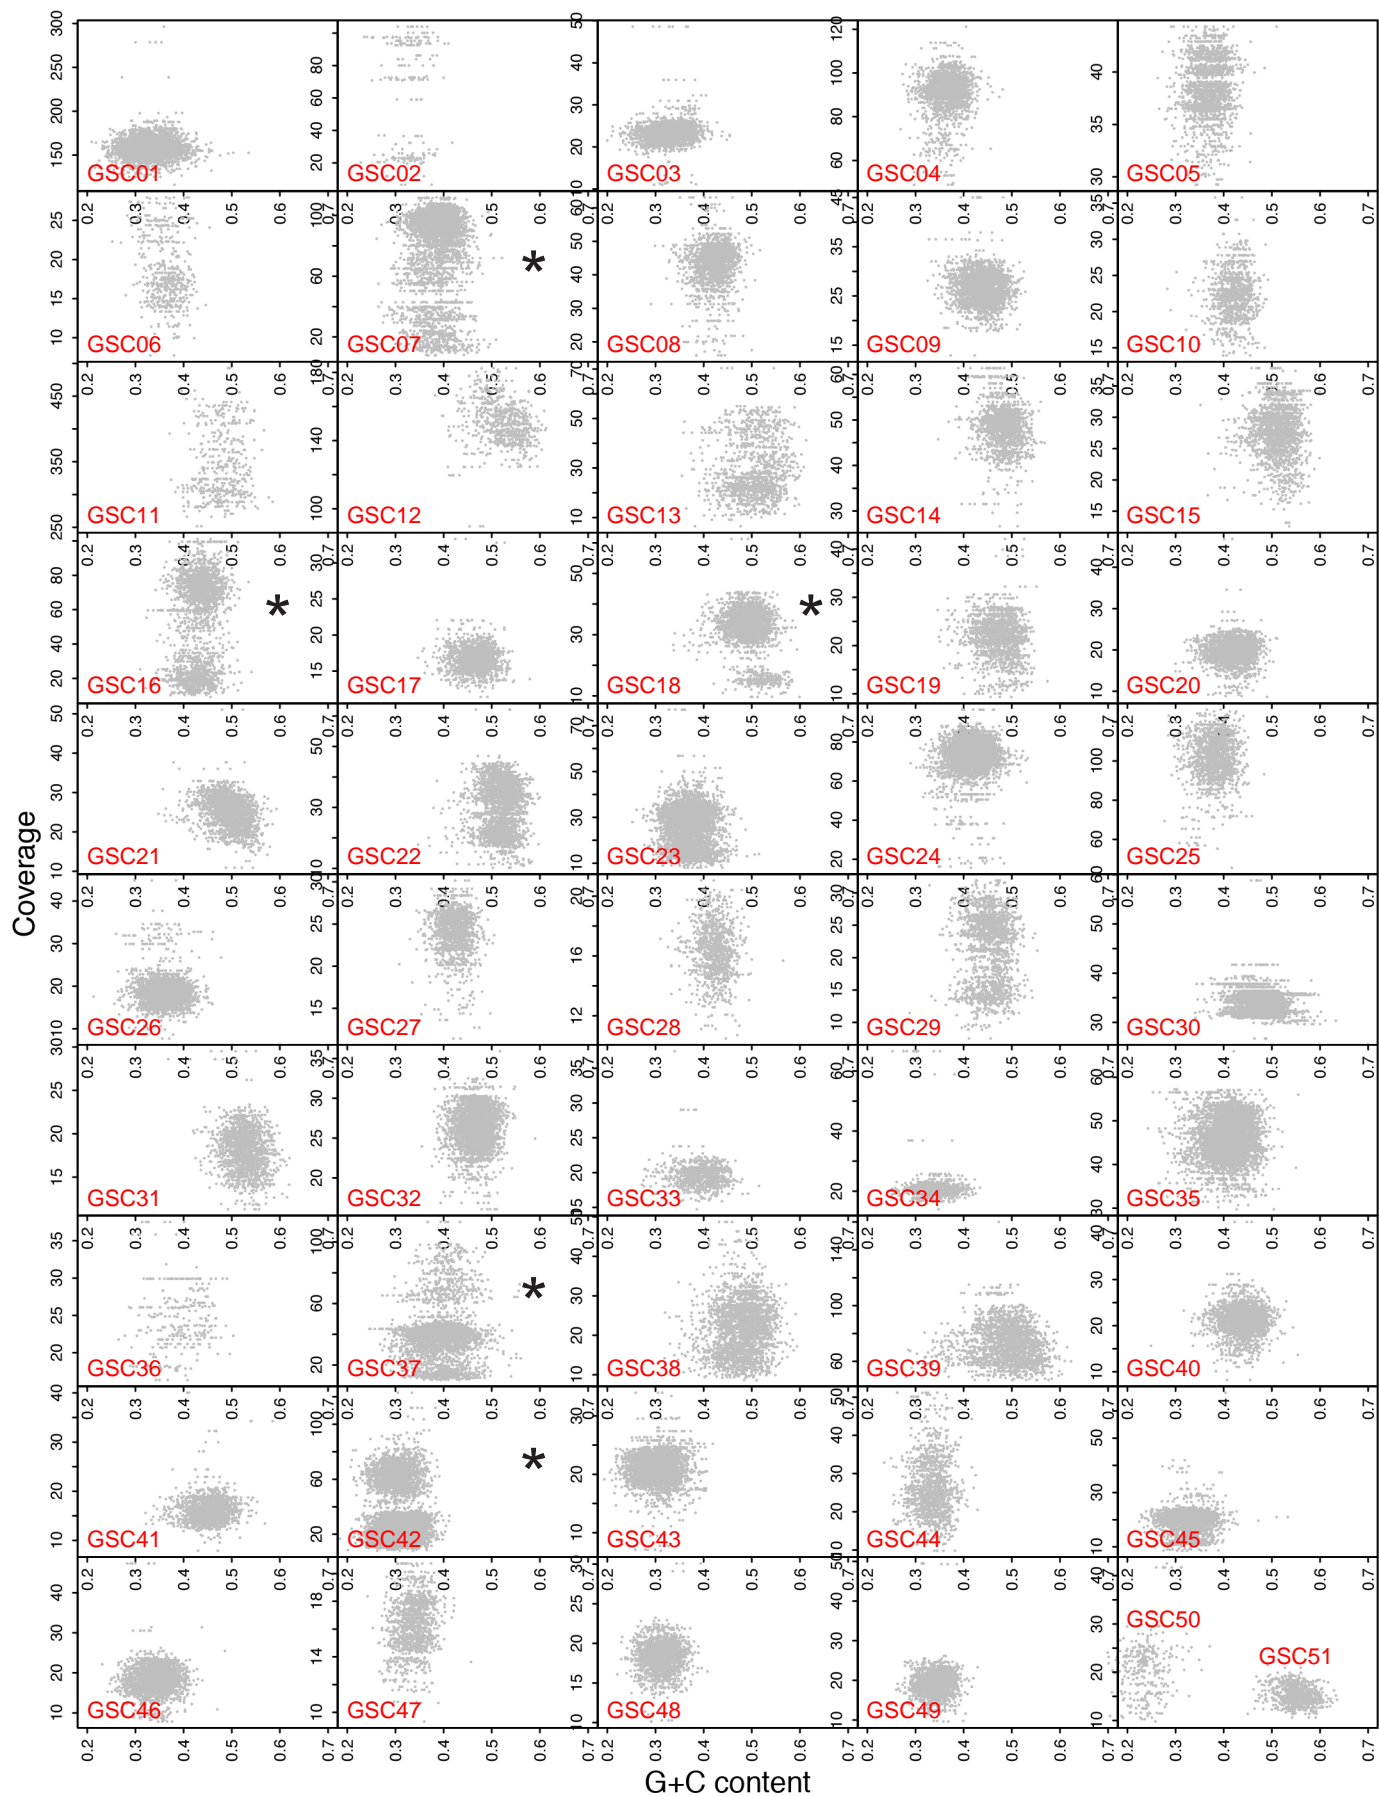

**Figure S3.** Coverage and GC content of contigs within each bin. Y-axes have different scales (LHS of each plot). \*Compositionally similar co-binned genomes with imprecise coverage separation.

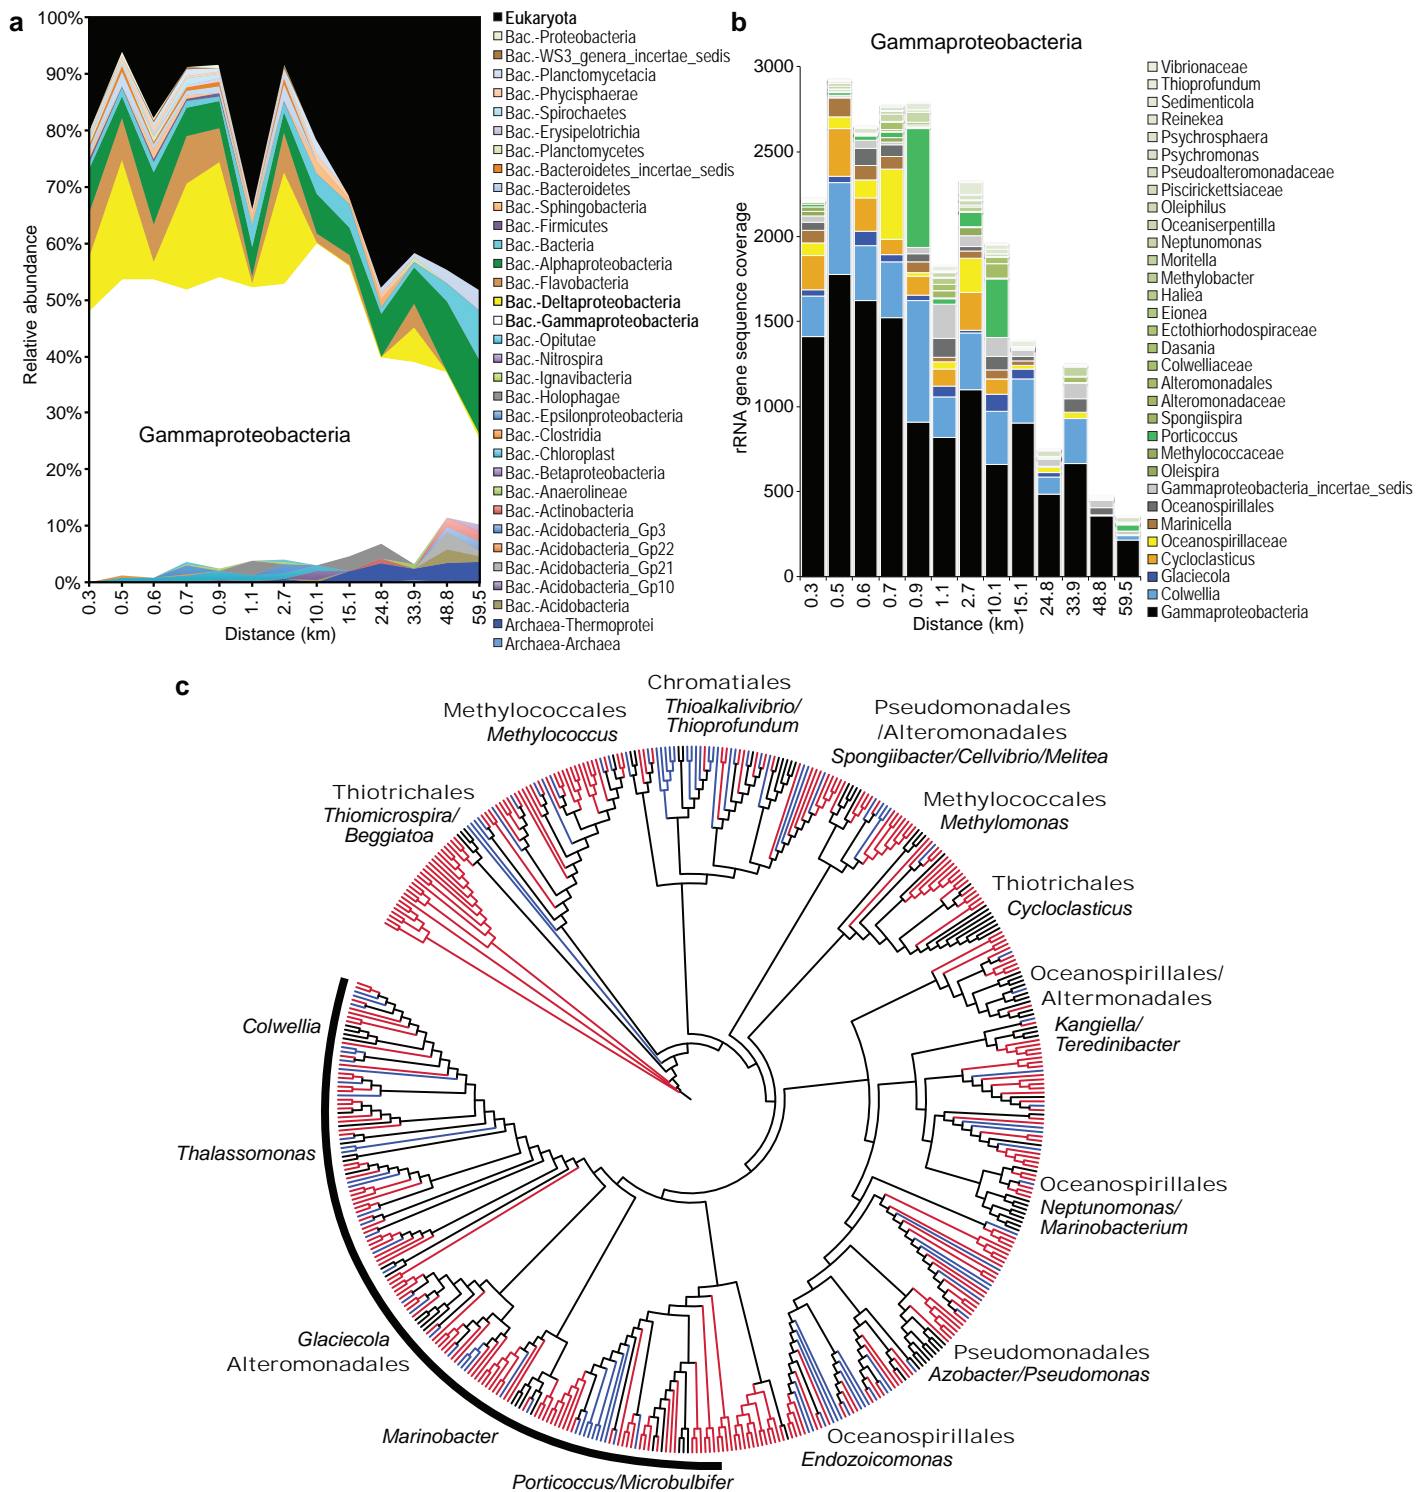

**Figure S4.** Phylogeny based on rRNA genes reconstructed from rarefied data, **(a)** Phylogeny per site. Eukaryota are relatively abundant in distal sites (23-52% versus 6-34% near-well). Bacteria, particularly Gammaproteobacteria increase in abundance relative to both Eukaryota and Archaea. **(b)** Stacked bar chart of Gammaproteobacteria rRNA gene sequence coverage per site based on RDP genus level designation or higher. The average number of unique designations is  $13 \pm 2$  (1 standard deviation) for near-well sites, twice that for distal sites ( $7 \pm 3$ ). **(c)** Neighbor-joining tree depicting phylogenetic 16S rRNA gene diversity among the Gammaproteobacteria for near-well (red) and distal samples (blue), compared with reference sequences (black). Genus (italics) and order (bold) names are given for reference sequence clusters. Gammaproteobacterial richness at near-well sites was 317 (15,000x total 16S rRNA gene coverage), and the richness at distal sites was 152 (6,000x total 16S rRNA gene coverage).

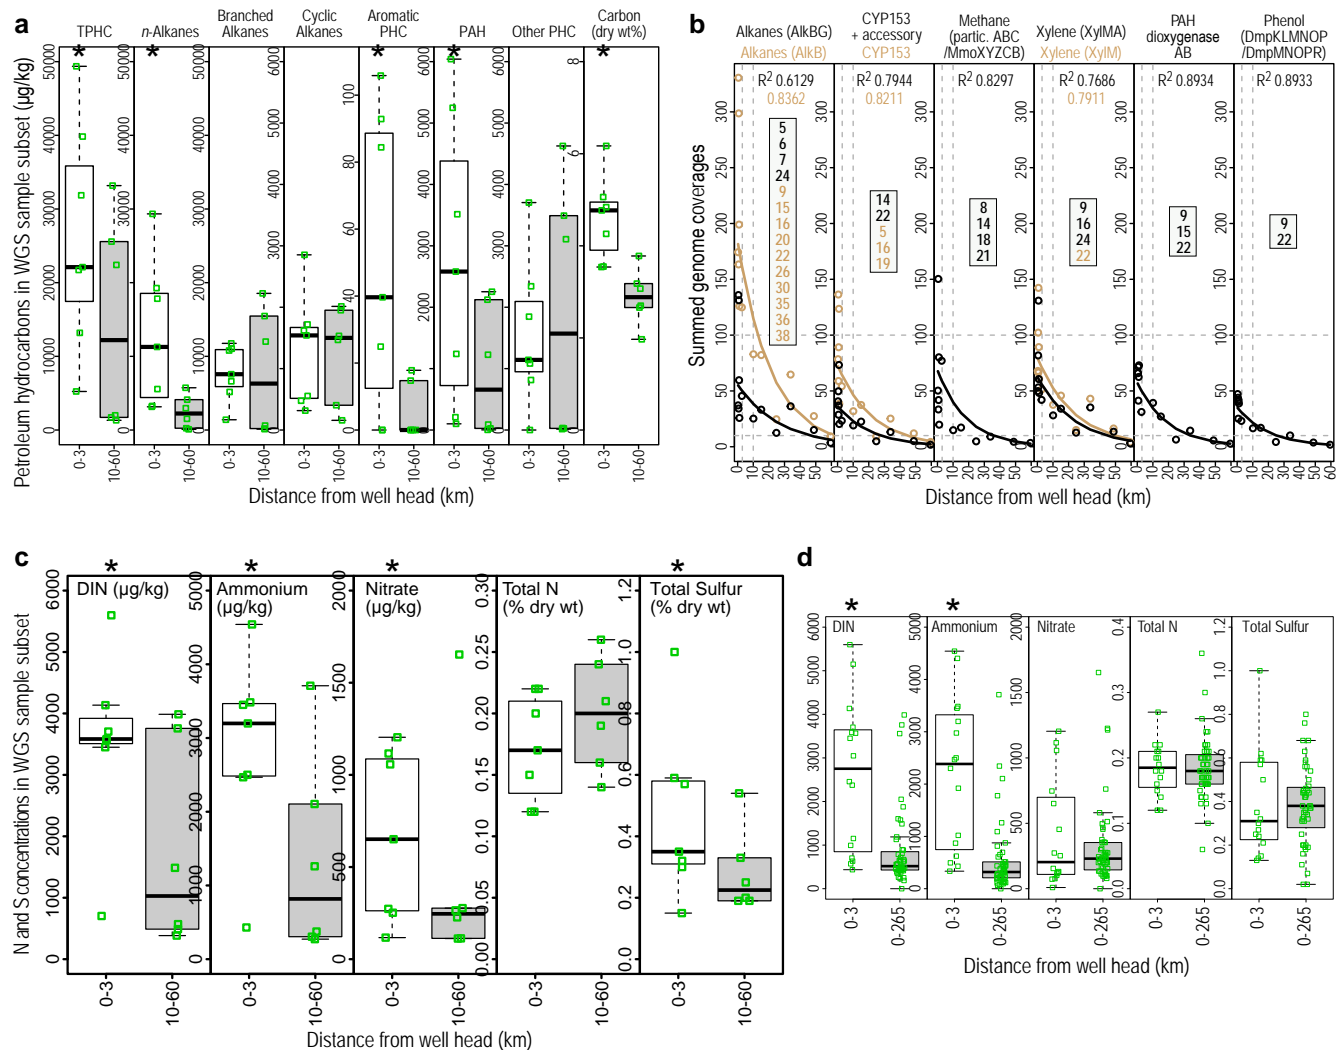

**Figure S5. (a)** Boxplots of petroleum hydrocarbon and carbon concentrations in the 13 metagenome samples 0-3 km (near-well) and 10-60 km (distal) from the MC252 wellhead. **(b)** Summed per site abundance of genome bins possessing genes associated with hydrocarbon degradation. Points are fitted with exponential curves. Bin numbers are listed in boxes central to each plot. Points in yellow represent the combined abundance of bin numbers given in black and yellow. **(c)** Boxplots of N and S concentrations in samples 0-3 km (near-well) and 10-60 km (distal) from the MC252 wellhead. DIN values comprised of ammonium + nitrate. **(d)** Boxplots of N and S concentrations in all 64 samples reported by Mason et al. (2014b) at 0-265 km distance. Abbreviations: (total) petroleum hydrocarbons, (T)PHC; weight, wt; dissolved inorganic nitrogen (DIN). \*Concentrations higher near-well. The underlying geochemical data presented in boxplots are from Mason et al. (2014b supplementary online materials where total alkanes = total *n*-alkanes).

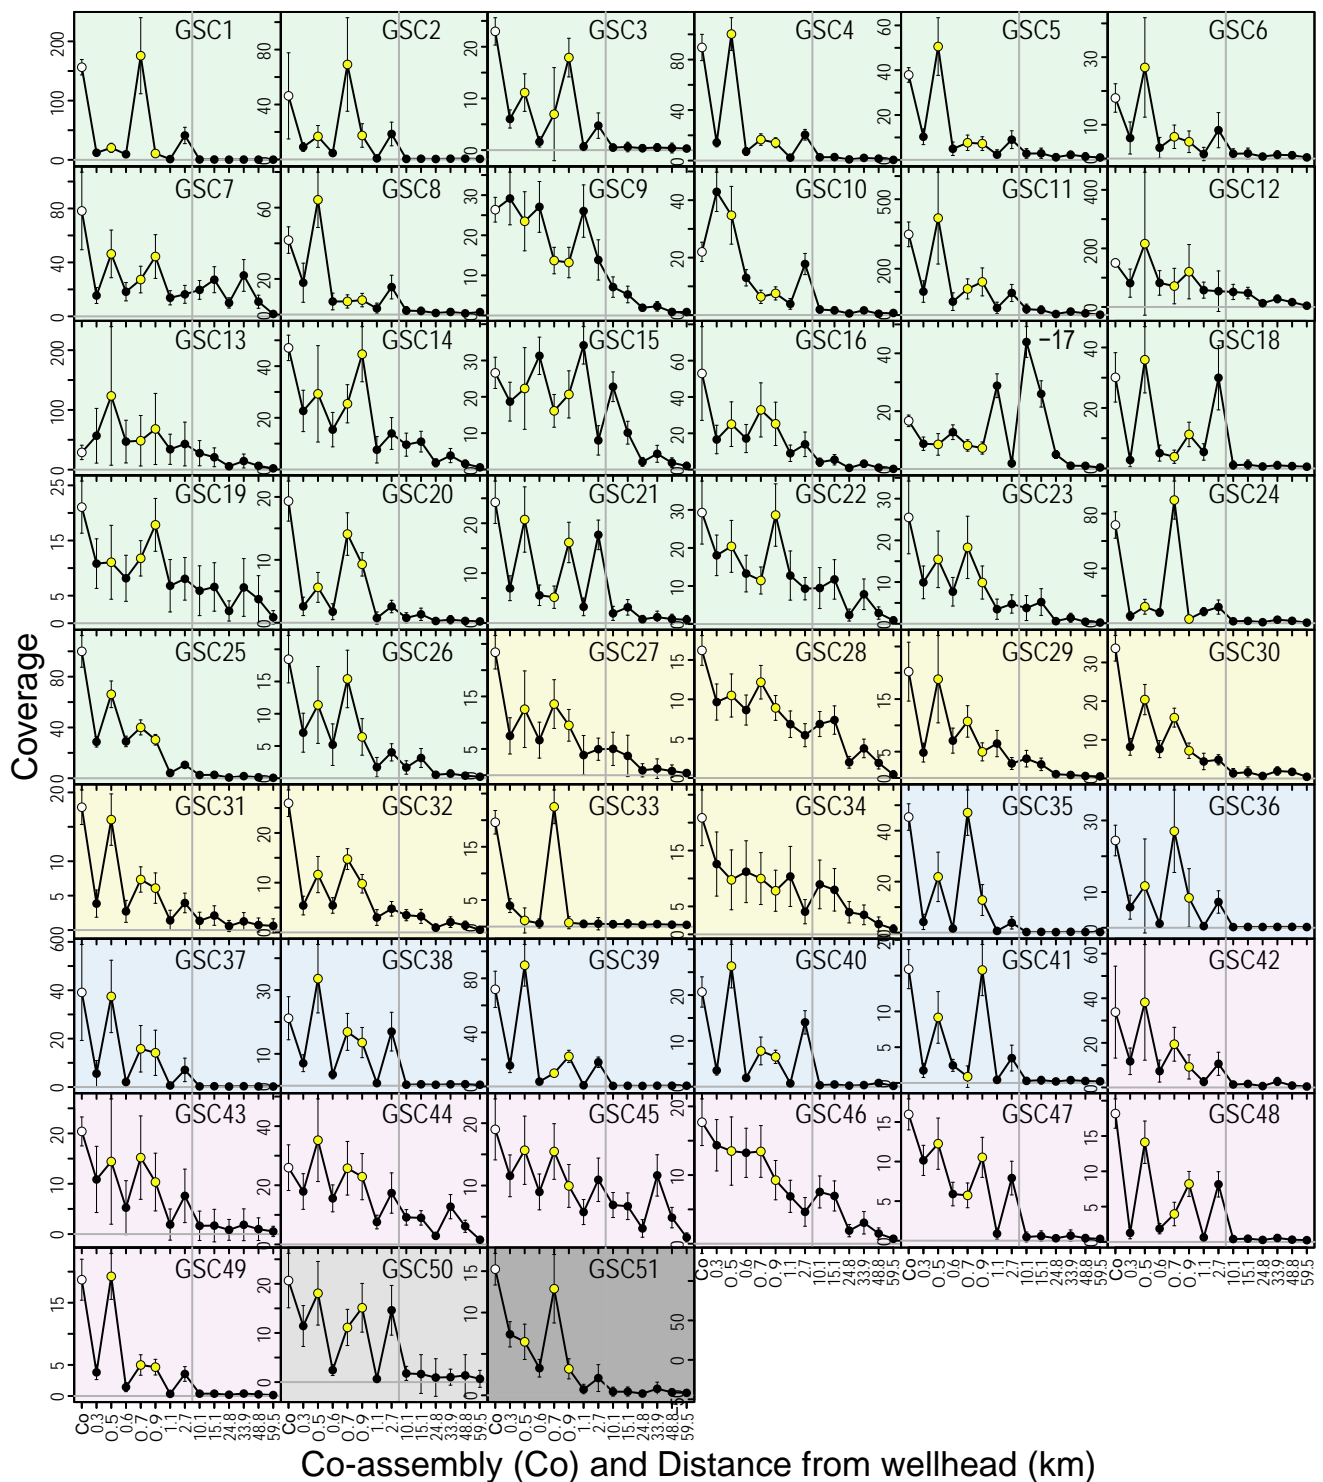

**Figure S6.** Average genome bin coverages per site determined by mapping reads to the co-assembly. Error bars = 1 standard deviation. Samples contributing to the co-assembly (white points) are bolded and points shown in yellow. Plots are organized by phylogenetic group: Gammaproteobacteria (green), Alphaproteobacteria (yellow), Deltaproteobacteria (blue), Cytophaga-Flavobacterium-Bacteroides group (CFB, pink), and unknown Bacteria (grey).

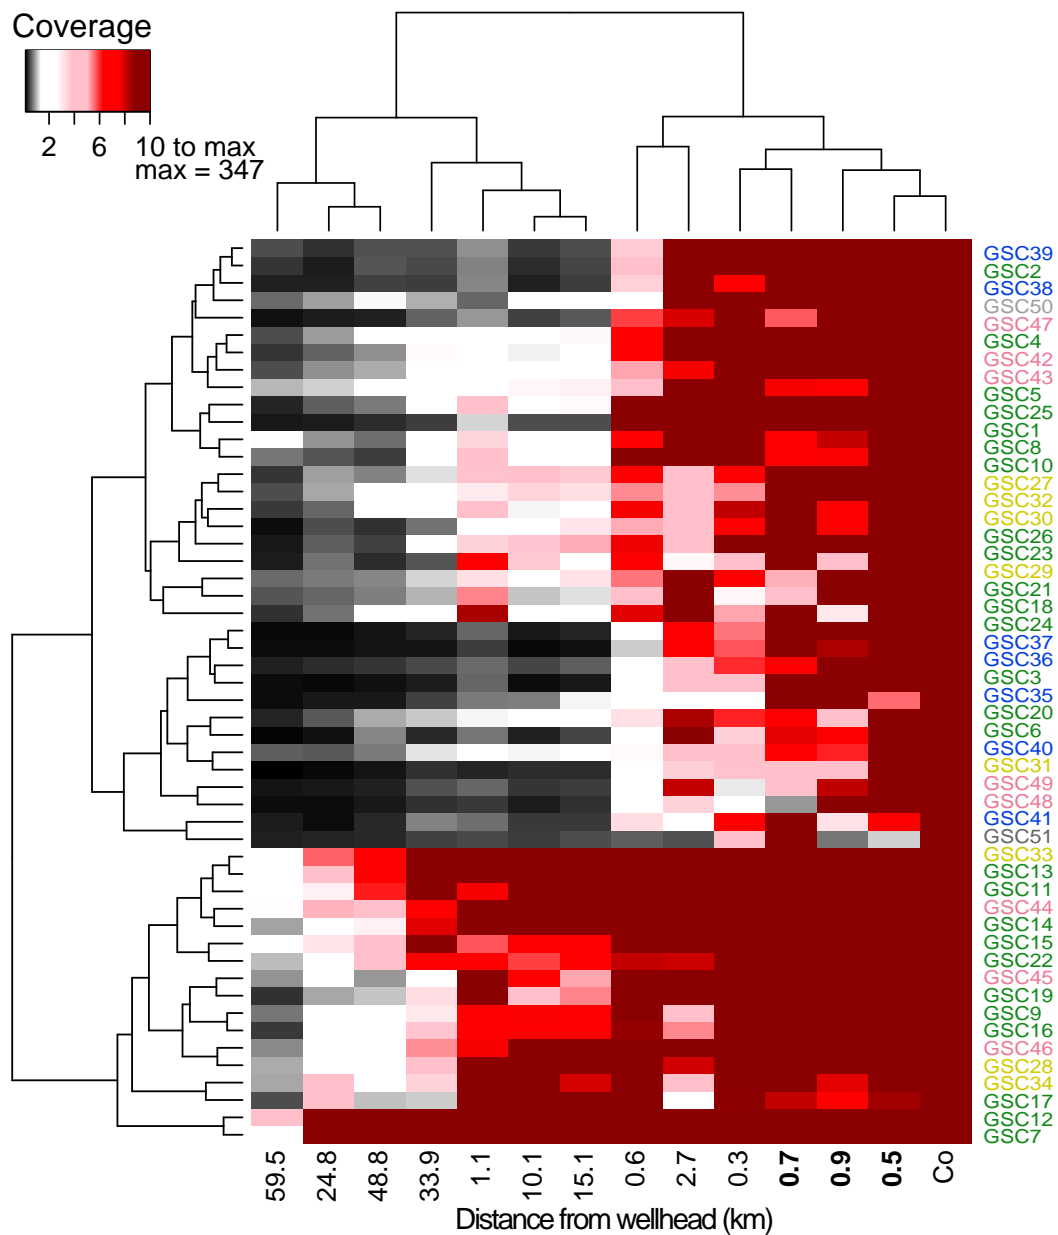

**Figure S7.** Heatmap and hierarchical clustering of genome bin abundance per site or Co-assembly (Co). Samples contributing to the co-assembly are bolded. Abundances  $\geq 10$  are assigned the same color (dark red). Bins (RHS) are colored by taxonomic group: Gammaproteobacteria (green), Alphaproteobacteria (yellow), Deltaproteobacteria (blue), Cytophaga-Flavobacterium-Bacteroides group (CFB, pink), and unknown Bacteria (grey).





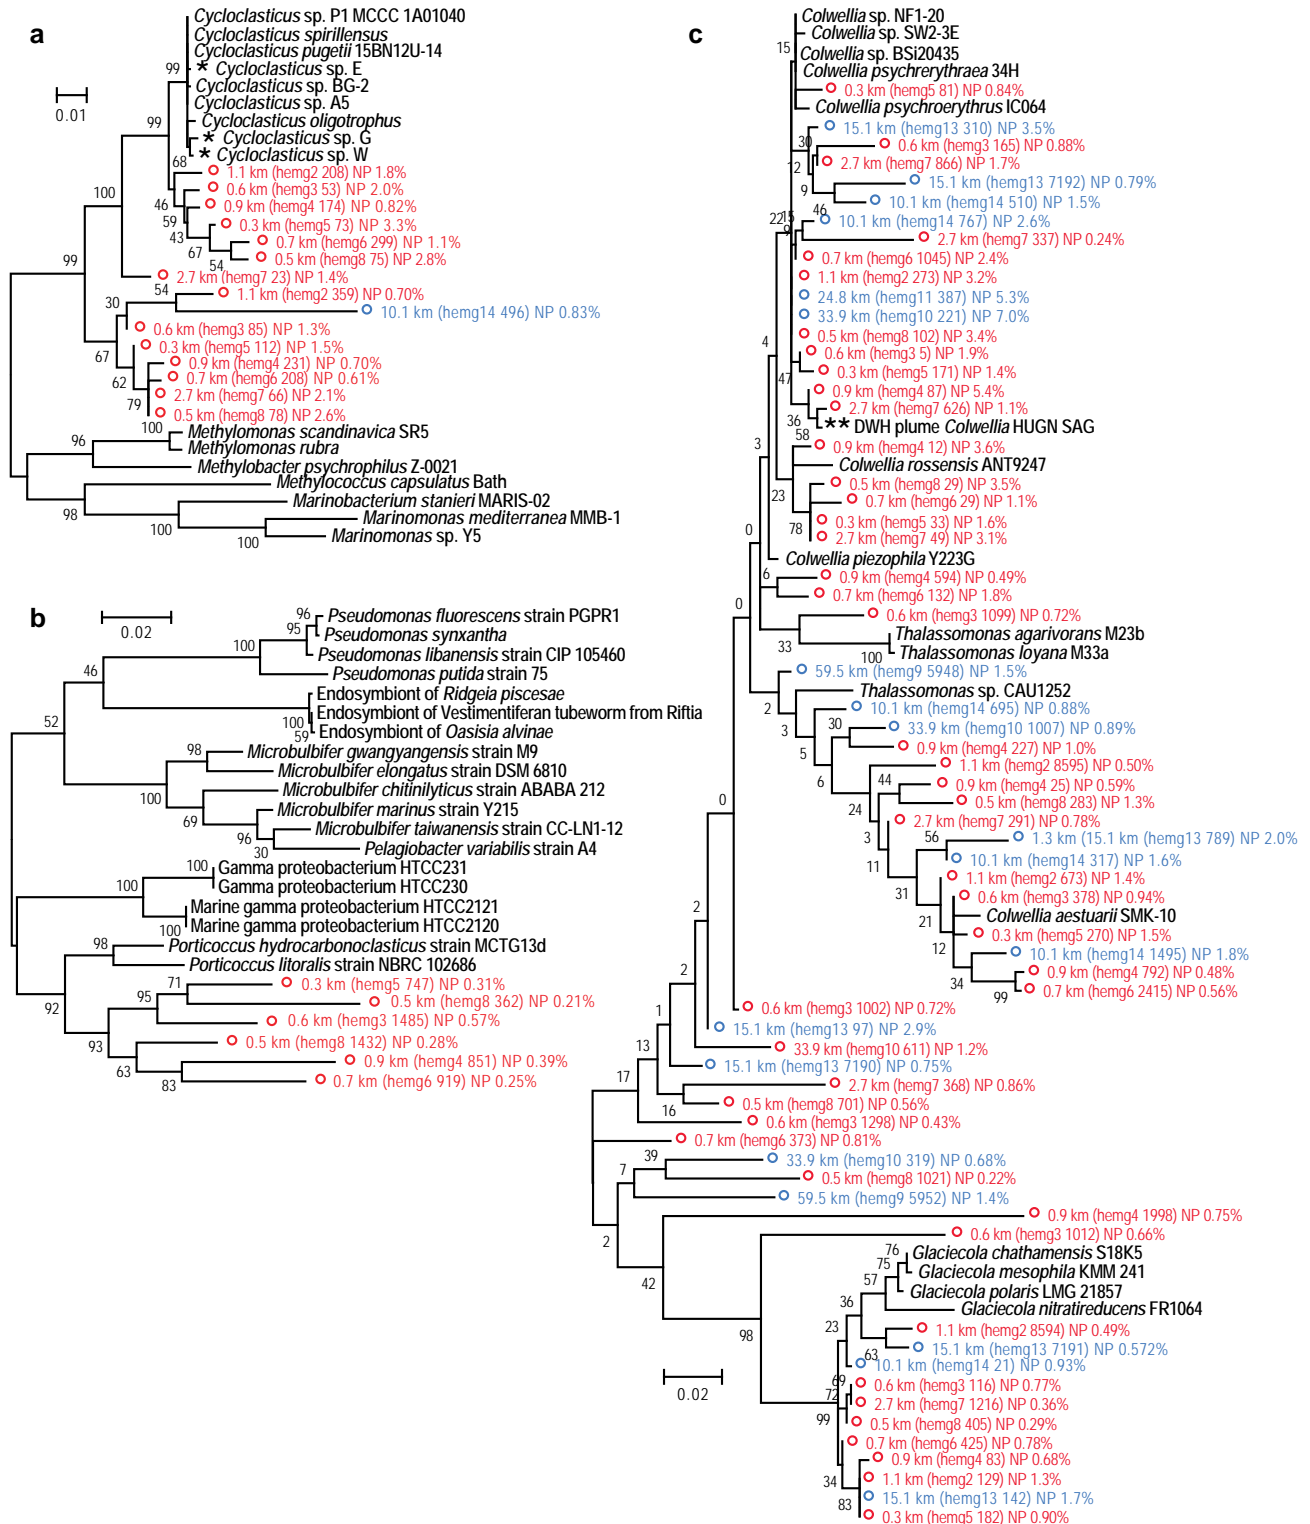

**Figure S9.** Maximum-Likelihood trees showing the phylogenetic relatedness of 16S rRNA genes from near-well (red) and distal (blue) sites that are most closely related to **(a) *Cycloclasticus***, **(b) *Porticoccus***, and **(c) *Colwellia*** species. Sequence identifiers are in parentheses. Norm Priors (NP) denote abundances per sample. Tree construction employed near full-length 16S rRNA genes and 500 bootstrap replicates. 16S sequences related to these hydrocarbonoclastic genera were recovered from rarified sequence data up to ~10 km from MC252 for *Cycloclasticus* and *Porticoccus*, or 33.9 km in the case of *Colwellia*. \*Northern Gulf of Mexico *Cycloclasticus* strains (Geiselbrecht *et al.*, 1998). \*\*16S from a DWH plume *Colwellia* single amplified genome (SAG) sequence (Mason *et al.*, 2014a).

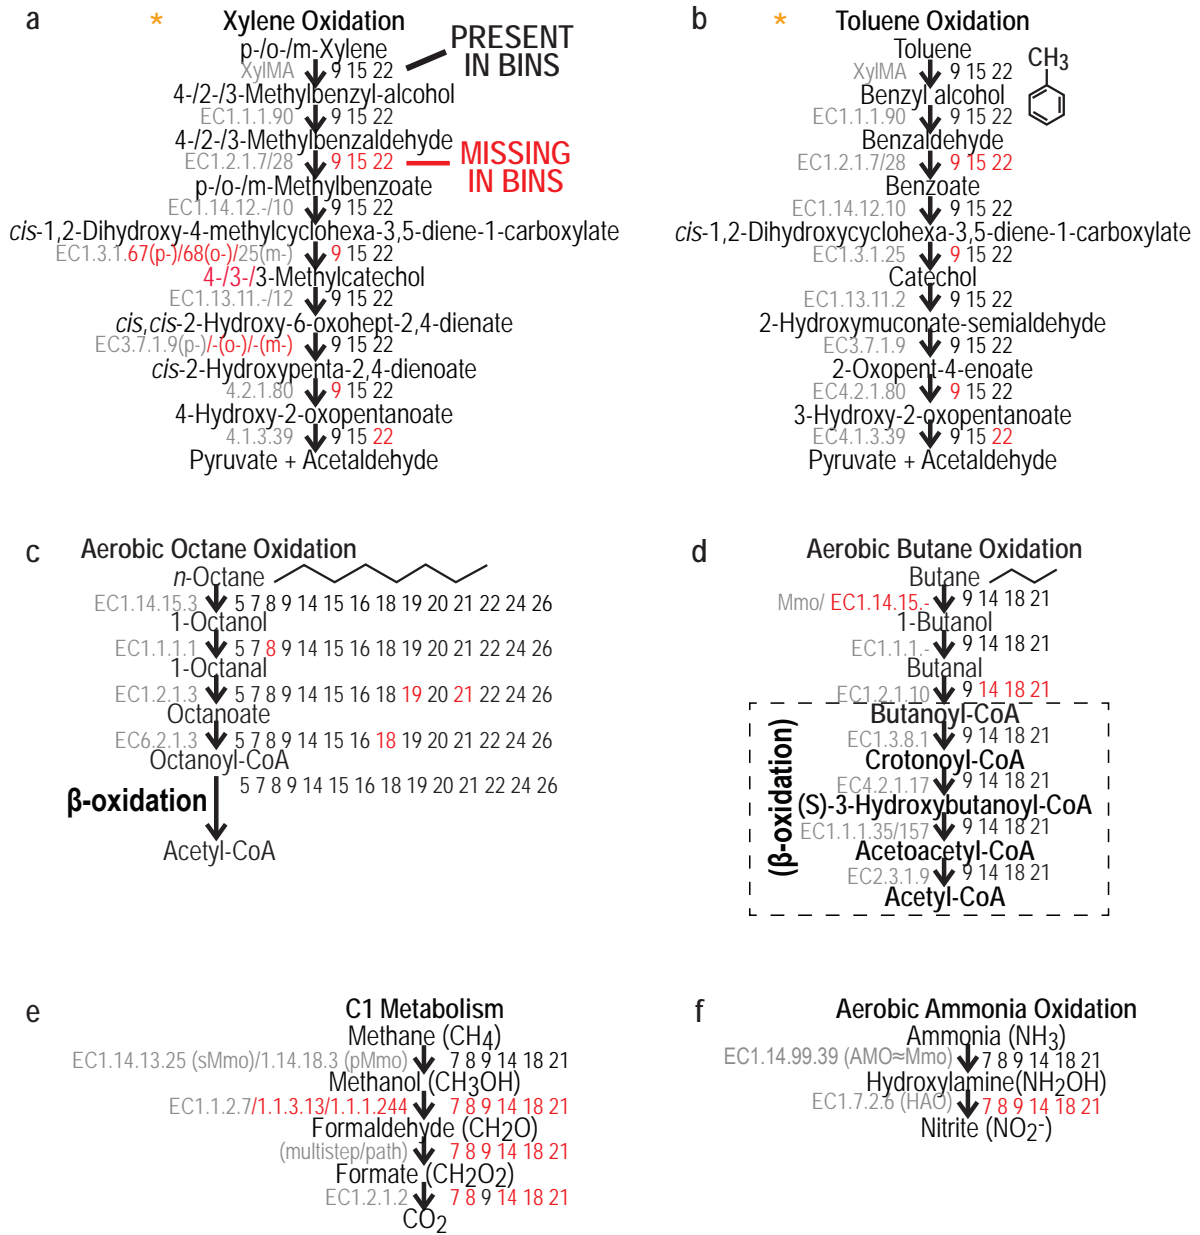

**Figure S10. (a-b)** Aromatic hydrocarbon oxidation pathways indicated by a yellow \* in genome bin Group 4 (Fig. 4). **(c-d)** Alkane oxidation pathways using **(c)** alkane 1-monooxygenase and targeting C5-C10 alkanes, or **(d)** methane monooxygenase, Mmo, and targeting C1-C5 alkanes. **(e-f)** Incomplete methane and ammonium oxidation pathways using Mmo. **(a-f)** Genome bin numbers are shown to the right of pathway arrows. Genes present are shown in grey. Bins with some of the pathway genes present are shown in black. Genes missing and bins with genes unidentified for particular steps are shown in red.

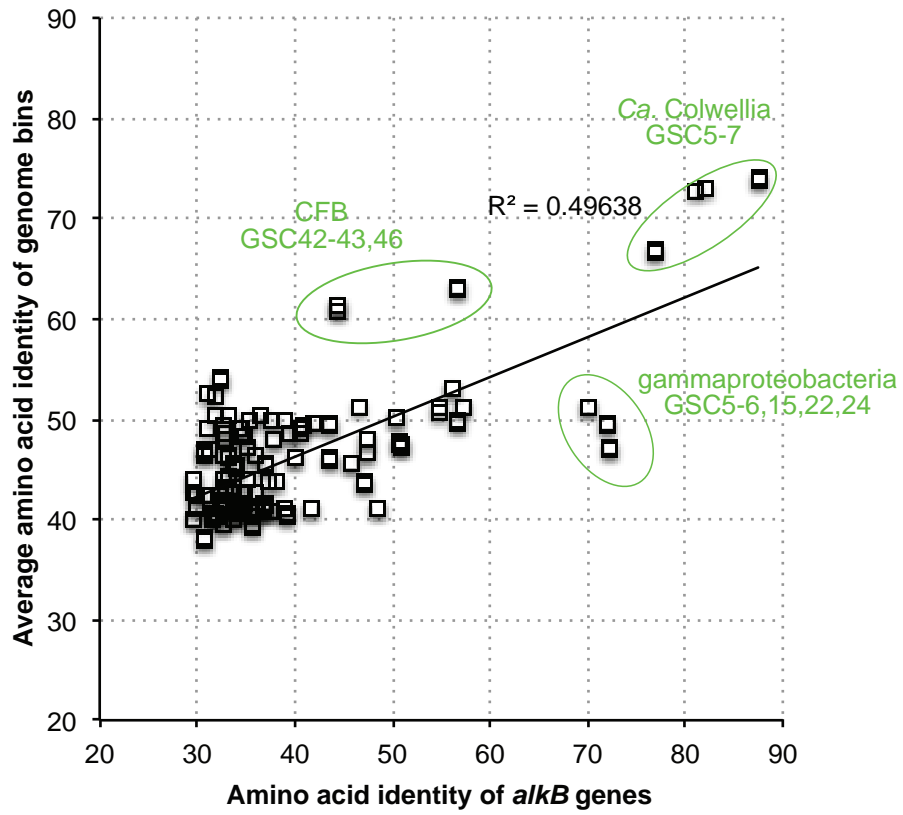

**Figure S11.** Comparisons of *alkB* gene and genome bin relatedness based on pairwise amino acid identities determined during reciprocal searches.

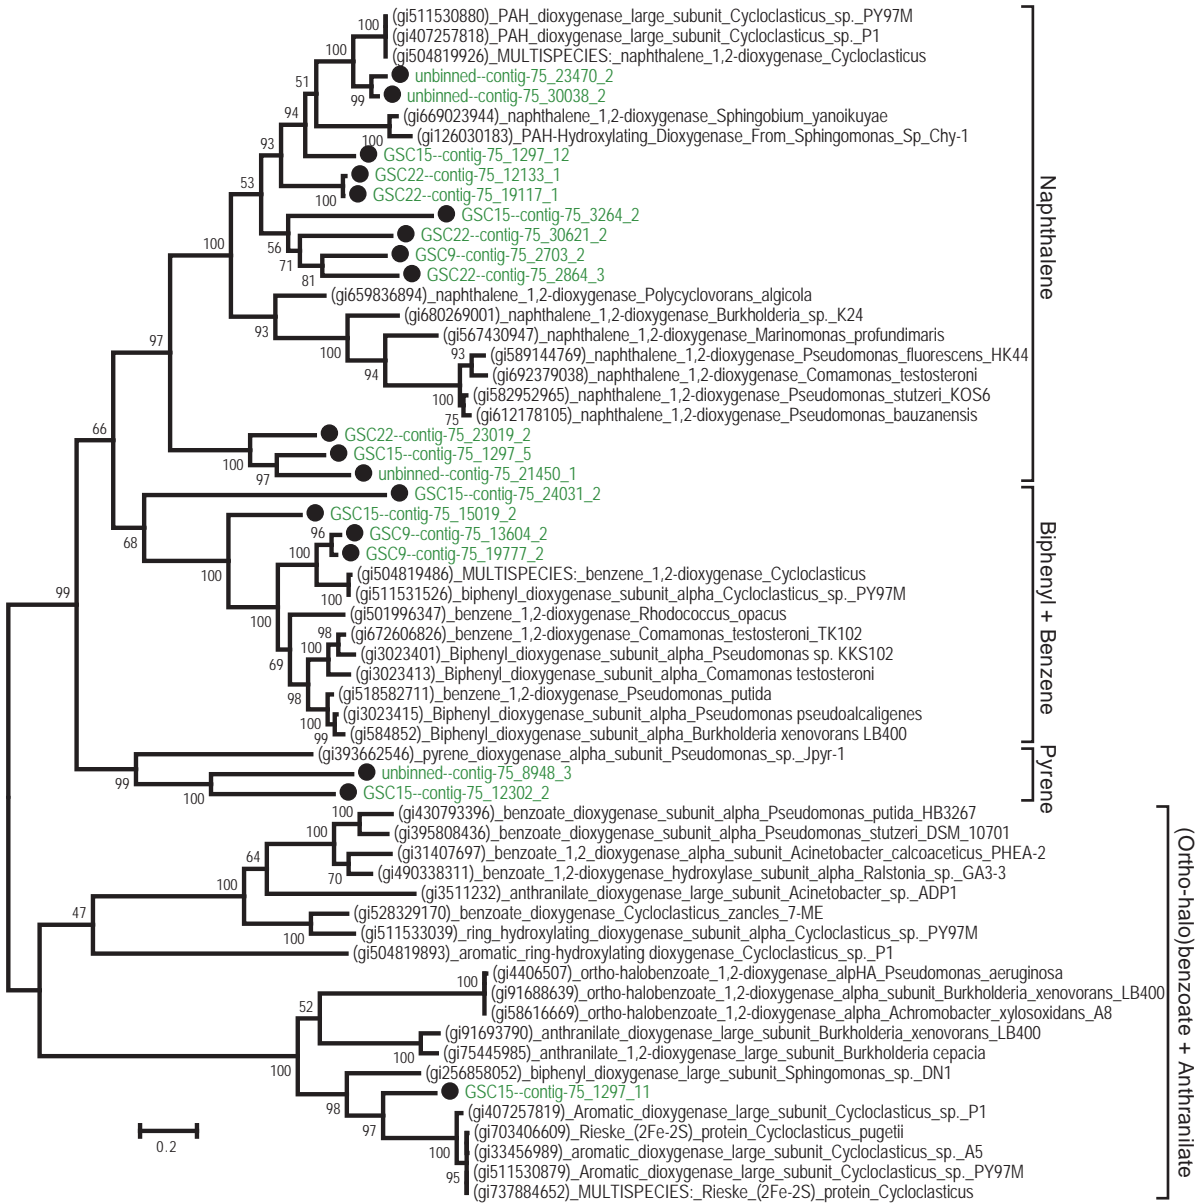

**Figure S12.** Maximum-Likelihood tree depicting the phylogenetic relatedness among predicted protein sequences of (near) full length candidate PAH dioxygenases alpha subunits from our genome bins (green) compared with reference naphthalene, biphenyl, pyrene and anthranilate PAH dioxygenases and benzene and (ortho-halo-)benzoate aromatic dioxygenases. GenBank accession numbers for reference sequences are in parentheses. Tree construction employed 340 amino acid positions and 500 bootstrap replicates.

**Table S1. Sequence data input (trimmed), and IDBA-UD assembly summary.**

| Sample ID          | Distance (km)      | WGS PE reads (millions) <sup>1</sup> | WGS length (Gbp) | Assembled length (Mbp) <sup>2</sup> | N50          | Max contig     | Contig count* | WTS PE reads (millions) <sup>1</sup> | Reads mapped to rRNA | Reads mapped to CDS | rRNA (% of reads) | RNA types analyzed | RNA amplified |
|--------------------|--------------------|--------------------------------------|------------------|-------------------------------------|--------------|----------------|---------------|--------------------------------------|----------------------|---------------------|-------------------|--------------------|---------------|
| BP_331             | 0.3                | 166                                  | 17               | 28                                  | 3,417        | 73,930         | 8,010         | 48                                   | 6,161,432            | 714,996             | 89.6              | rRNA+mRNA          | Yes           |
| <b>BP_315</b>      | <b>0.5</b>         | <b>275</b>                           | <b>28</b>        | <b>63</b>                           | <b>4,052</b> | <b>101,350</b> | <b>15,864</b> | 58                                   | 3,956,483            | 330,029             | 92.3              | rRNA+mRNA          | -             |
| BP_350             | 0.6                | 153                                  | 15               | 26                                  | 3,672        | 74,260         | 7,077         | 52                                   | 3,243,259            | 185,051             | 94.6              | rRNA+mRNA          | -             |
| <b>BP_139</b>      | <b>0.7</b>         | <b>187</b>                           | <b>19</b>        | <b>79</b>                           | <b>3,981</b> | <b>76,457</b>  | <b>19,965</b> | 50                                   | 3,018,430            | 306,824             | 90.8              | rRNA+mRNA          | -             |
| <b>BP_143</b>      | <b>0.9</b>         | <b>204</b>                           | <b>21</b>        | <b>58</b>                           | <b>4,101</b> | <b>51,853</b>  | <b>14,517</b> | 58                                   | 3,854,101            | 353,822             | 91.6              | rRNA+mRNA          | -             |
| BP_366             | 1.1                | 266                                  | 27               | 34                                  | 3,760        | 131,389        | 8,923         | 37                                   | 3,390,160            | 377,874             | 90.0              | rRNA+mRNA          | Yes           |
| BP_120             | 1.3                | -                                    | -                | -                                   | -            | -              | -             | 37                                   | 1,808,118            | 244,029             | 88.1              | rRNA               | Yes           |
| BP_278             | 2.7                | 144                                  | 15               | 28                                  | 3,384        | 73,930         | 7,896         | 53                                   | 3,293,179            | 291,043             | 91.9              | rRNA+mRNA          | -             |
| <b>Average</b>     | <b>1.0</b>         | <b>199</b>                           | <b>20</b>        | <b>45</b>                           | <b>3,767</b> | <b>80,746</b>  | <b>11,750</b> | <b>49</b>                            | <b>3,590,645</b>     | <b>350,459</b>      | <b>91.1</b>       | -                  | -             |
| BP_101             | 10.1               | 285                                  | 29               | 18                                  | 3,648        | 78,608         | 4,640         | 32                                   | 3,326,370            | 522,218             | 86.4              | rRNA+mRNA          | Yes           |
| BP_155             | 15.1               | 344                                  | 35               | 12                                  | 3,464        | 58,165         | 3,517         | 21                                   | 1,990,232            | 225,102             | 89.8              | rRNA+mRNA          | Yes           |
| BP_444             | 24.8               | 369                                  | 37               | 2                                   | 3,182        | 26,366         | 557           | -                                    | -                    | -                   | -                 | -                  | -             |
| BP_463             | 33.9               | 291                                  | 29               | 6                                   | 3,139        | 42,788         | 1,732         | 36                                   | 1,337,250            | 202,961             | 86.8              | rRNA+mRNA          | Yes           |
| BP_501             | 48.8               | 355                                  | 36               | 10                                  | 4,238        | 26,854         | 2,481         | -                                    | -                    | -                   | -                 | -                  | -             |
| BP_186             | 59.5               | 295                                  | 30               | 1                                   | 2,646        | 23,506         | 481           | -                                    | -                    | -                   | -                 | -                  | -             |
| <b>Average</b>     | <b>27.6</b>        | <b>305</b>                           | <b>31</b>        | <b>8</b>                            | <b>3,386</b> | <b>42,715</b>  | <b>2,235</b>  | <b>30</b>                            | <b>2,217,951</b>     | <b>316,760</b>      | <b>87.7</b>       | -                  | -             |
| <b>Co-assembly</b> | <b>0.5+0.7+0.9</b> | <b>666</b>                           | <b>68</b>        | <b>181</b>                          | <b>4,748</b> | <b>134,227</b> | <b>41,000</b> | -                                    | -                    | -                   | -                 | -                  | -             |

Note: Co-assembly and co-assembled samples are shown in blue.

<sup>1</sup>Trimmed read counts

<sup>2</sup>Contigs >2kbp long.

**Table S2. Genomic bin characteristics.**

| Bin GSC | Nearest related genome (reference)               | AAI <sup>1</sup> (%) to reference | Nearest RecA                                                      | RecA %ID | Average G+C | Average coverage | %CGs /107 | %Surplus CGs/107 | Genomes per bin | Phylog. cluster | AAI <sup>2</sup> (%) to bin | CDS count | Bin length (bp) | Contig count |
|---------|--------------------------------------------------|-----------------------------------|-------------------------------------------------------------------|----------|-------------|------------------|-----------|------------------|-----------------|-----------------|-----------------------------|-----------|-----------------|--------------|
| 1       | <i>Candidatus Thiomargarita nelsonii</i>         | 66                                | <i>Ca. Thiomargarita nelsonii</i>                                 | 84       | 32          | 156              | 83        | 4                | 1               | 1               | 86 GSC3                     | 4,088     | 4,888,626       | 787          |
| 2       | <i>Candidatus Thiomargarita nelsonii</i>         | 65                                | -                                                                 | -        | 32          | 46               | 10        | 0                | 1               | 1               | 80 GSC1                     | 264       | 276,972         | 41           |
| 3       | <i>Candidatus Thiomargarita nelsonii</i>         | 66                                | <i>Ca. Thiomargarita nelsonii</i>                                 | 86       | 32          | 23               | 76        | 1                | 1               | 1               | 86 GSC1                     | 2,709     | 2,996,330       | 465          |
| 4       | <i>Colwellia psychrerythraea</i> 34H             | 73                                | -                                                                 | -        | 36          | 90               | 41        | 2                | 1               | 2               | 82 GSC6                     | 1,929     | 1,928,427       | 406          |
| 5       | <i>Colwellia psychrerythraea</i> 34H             | 73                                | <i>C. psychrerythraea</i>                                         | 92       | 36          | 38               | 53        | 3                | 1               | 2               | 81 GSC4                     | 2,020     | 2,113,321       | 218          |
| 6       | <i>Colwellia psychrerythraea</i> 34H             | 68                                | -                                                                 | -        | 36          | 18               | 7         | 0                | 1               | 2               | 82 GSC4                     | 643       | 575,276         | 175          |
| 7       | <i>Colwellia psychrerythraea</i> 34H             | 90                                | -                                                                 | -        | 38          | 90,22            | 57        | 2                | 2*              | 2               | 74 GSC4                     | 4,925     | 5,186,372       | 909          |
| 8       | <i>Cycloclasticus zancles</i>                    | 73                                | <i>Cycloclasticus</i> sp. P1, <i>C.zancles</i>                    | 94       | 42          | 42               | 50        | 0                | 1               | 3               | 86 GSC10                    | 1,691     | 1,571,359       | 288          |
| 9       | <i>Cycloclasticus</i> sp. P1                     | 79                                | <i>Cycloclasticus</i> sp. P1, <i>C.zancles</i>                    | 94       | 44          | 26               | 48        | 21               | 2**             | 3               | 73 GSC8                     | 2,643     | 2,296,057       | 617          |
| 10      | <i>Cycloclasticus</i> sp. P1                     | 72                                | -                                                                 | -        | 42          | 22               | 17        | 0                | 1               | 3               | 86 GSC8                     | 1,070     | 889,100         | 249          |
| 11      | <i>Porticoccus hydrocarbonoclasticus</i> MCTG13d | 59                                | <i>P. hydrocarbonoclasticus</i> MCTG13d                           | 86       | 49          | 347              | 30        | 0                | 1               | 4               | 83 GSC13                    | 563       | 547,319         | 149          |
| 12      | <i>Porticoccus hydrocarbonoclasticus</i> MCTG13d | 58                                | -                                                                 | -        | 51          | 150              | 13        | 0                | 1               | 4               | 82 GSC11                    | 776       | 758,082         | 213          |
| 13      | <i>Porticoccus hydrocarbonoclasticus</i> MCTG13d | 56                                | -                                                                 | -        | 50          | 29               | 14        | 1                | 1               | 4               | 82 GSC11                    | 1,516     | 1,432,455       | 384          |
| 14      | <i>Porticoccus hydrocarbonoclasticus</i> MCTG13d | 61                                | <i>P. hydrocarbonoclasticus</i> MCTG13d                           | 84       | 48          | 47               | 82        | 1                | 1               | 4               | 73 GSC11                    | 1,541     | 1,513,903       | 287          |
| 15      | <i>Porticoccus hydrocarbonoclasticus</i> MCTG13d | 60                                | <i>P. hydrocarbonoclasticus</i> MCTG13d                           | 88       | 50          | 27               | 80        | 0                | 1               | 4               | 64 GSC14                    | 1,824     | 1,791,859       | 350          |
| 16      | <i>gammaproteobacterium</i> HdN1                 | 54                                | -                                                                 | -        | 43          | 71,21            | 38        | 0                | 2*              | -               | 54 GSC18                    | 2,657     | 2,489,254       | 673          |
| 17      | <i>Teredinibacter turnerae</i> T7901             | 58                                | -                                                                 | -        | 46          | 17               | 31        | 2                | 1               | -               | 55 GSC14                    | 1,630     | 1,513,391       | 426          |
| 18      | <i>gammaproteobacterium</i> IMCC2047             | 61                                | <i>gammaproteobacterium</i> IMCC2047                              | 85       | 49          | 33,15            | 79        | 11               | 2*              | -               | 55 GSC14                    | 2,537     | 2,473,031       | 476          |
| 19      | <i>gammaproteobacterium</i> IMCC2047             | 54                                | <i>gammaproteobacterium</i> HIMB30                                | 76       | 47          | 21               | 48        | 0                | 1               | -               | 55 GSC18                    | 1,722     | 1,606,611       | 336          |
| 20      | <i>Cycloclasticus</i> sp. P1                     | 50                                | -                                                                 | -        | 41          | 19               | 69        | 2                | 1               | -               | 50 GSC23                    | 2,790     | 2,689,849       | 549          |
| 21      | <i>Candidatus Thiomargarita nelsonii</i>         | 53                                | <i>Thiothrix nivea</i>                                            | 79       | 49          | 24               | 80        | 1                | 1               | -               | 53 GSC8                     | 1,979     | 1,865,361       | 371          |
| 22      | <i>Nitrosococcus watsonii</i>                    | 51                                | <i>Ca. Tenderia electrophaga</i>                                  | 79       | 51          | 29               | 42        | 15               | 2**             | -               | 50 GSC21                    | 2,713     | 2,555,975       | 636          |
| 23      | <i>Kangiella koreensis</i> SW-125                | 54                                | <i>Oleagrimonas soli</i> , <i>K. aquimarina</i>                   | 80       | 37          | 26               | 64        | 20               | 2**             | -               | 51 GSC5                     | 5,478     | 5,384,675       | 1,125        |
| 24      | <i>Hahella chejuensis</i> KCTC 2396              | 57                                | -                                                                 | -        | 41          | 72               | 76        | 0                | 1               | -               | 55 GSC18                    | 4,534     | 4,514,783       | 667          |
| 25      | <i>Cycloclasticus</i> sp. P1                     | 50                                | <i>Thiorhodovibrio</i> sp. 970                                    | 87       | 37          | 100              | 49        | 2                | 1               | 5               | 73 GSC26                    | 1,633     | 1,525,989       | 378          |
| 26      | <i>Kangiella koreensis</i> SW-125                | 48                                | <i>Solemya velum</i> gill symbiont, <i>Methylophaga frappieri</i> | 81       | 35          | 18               | 34        | 2                | 1               | 5               | 72 GSC25                    | 2,765     | 2,737,699       | 608          |
| 27      | <i>Micavibrio aeruginosavorus</i>                | 57                                | <i>M. aeruginosavorus</i> EPB                                     | 79       | 42          | 23               | 87        | 22               | 2**             | -               | 54 GSC29                    | 1,757     | 1,606,244       | 268          |
| 28      | <i>Micavibrio aeruginosavorus</i>                | 54                                | <i>O. indicum</i> , <i>O. pacidicum</i>                           | 77       | 41          | 16               | 41        | 2                | 1               | -               | 53 GSC27                    | 1,259     | 1,046,950       | 296          |
| 29      | <i>Micavibrio aeruginosavorus</i>                | 56                                | -                                                                 | -        | 44          | 20               | 38        | 7                | 1               | -               | 54 GSC27                    | 2,107     | 1,839,492       | 441          |
| 30      | Rhodobacterales bacterium HTCC2255               | 63                                | Rhodobacterales bacterium HTCC2255                                | 83       | 47          | 34               | 97        | 2                | 1               | 6               | 60 GSC31                    | 3,424     | 3,436,081       | 110          |
| 31      | Rhodobacterales bacterium HTCC2255               | 59                                | <i>Sulfitobacter mediterraneus</i>                                | 86       | 52          | 18               | 42        | 0                | 1               | 6               | 60 GSC30                    | 1,756     | 1,405,749       | 386          |
| 32      | <i>Oceanibaculum indicum</i> P24                 | 53                                | <i>Sneathiella glossodoripedis</i>                                | 90       | 46          | 26               | 89        | 3                | 1               | -               | 51 GSC28                    | 3,365     | 3,184,965       | 458          |
| 33      | <i>Oceanibaculum indicum</i> P24                 | 51                                | endosymbiont of <i>Acanthamoeba</i> sp. UWC36                     | 76       | 39          | 20               | 66        | 1                | 1               | -               | 51 GSC32                    | 1,095     | 976,746         | 159          |
| 34      | <i>Rickettsia bellii</i>                         | 54                                | -                                                                 | -        | 33          | 21               | 76        | 1                | 1               | -               | 48 GSC33                    | 1,078     | 999,820         | 178          |
| 35      | <i>Polaribacter</i> sp. MED152                   | 61                                | <i>Lutibacter</i> sp. LP1                                         | 94-96    | 30          | 64,22            | 67        | 74               | 3**             | 11              | 66 GSC44                    | 7,657     | 7,284,376       | 1,605        |
| 36      | <i>Polaribacter</i> sp. MED152                   | 74                                | <i>Polaribacter atrinae</i>                                       | 96       | 30          | 20               | 88        | 65               | 3**             | 11              | 63 GSC42                    | 3,939     | 4,125,614       | 523          |
| 37      | <i>Polaribacter</i> sp. MED152                   | 60                                | <i>Tenacibaculum dicentrarchi</i>                                 | 93       | 33          | 26               | 13        | 0                | 1               | 11              | 65 GSC42                    | 1,327     | 1,218,909       | 372          |
| 38      | <i>Aequorivita sublithicola</i> 9-3              | 66                                | <i>Ulvibacter</i> sp. LPB0005                                     | 90       | 32          | 19               | 52        | 6                | 1               | 11              | 64 GSC46                    | 2,770     | 2,718,766       | 495          |
| 39      | <i>Formosa</i> sp. AK20                          | 68                                | <i>Algibacter lectus</i>                                          | 92       | 34          | 18               | 54        | 2                | 1               | 11              | 64 GSC45                    | 2,765     | 2,643,860       | 527          |
| 40      | <i>Marinilabilia salmonicolor</i> JCM 21150      | 50                                | -                                                                 | -        | 33          | 16               | 34        | 0                | 1               | -               | 53 GSC49                    | 1,288     | 1,278,012       | 314          |
| 41      | <i>Anaerophaga</i> sp. HS1                       | 52                                | <i>Marinifilum fragile</i>                                        | 84       | 30          | 18               | 46        | 2                | 1               | -               | 53 GSC47                    | 2,107     | 2,098,621       | 475          |
| 42      | <i>Marinilabilia salmonicolor</i> JCM 21150      | 49                                | <i>Spingobacterium</i> sp. PM2-P1-29                              | 82       | 33          | 19               | 32        | 0                | 1               | -               | 54 GSC47                    | 2,075     | 2,112,534       | 522          |
| 43      | <i>Desulfobacterium autotrophicum</i> HRM2       | 53                                | <i>Desulfatirhabdium butyrativorans</i>                           | 80       | 40          | 45               | 69        | 3                | 1               | 12              | 70 GSC37                    | 5,893     | 6,773,533       | 593          |
| 44      | <i>Desulfotalea psychrophila</i> LSV54           | 47                                | -                                                                 | -        | 39          | 24               | 0         | 22               | 2**             | 12              | 64 GSC35                    | 421       | 475,316         | 65           |
| 45      | <i>Desulfobacterium autotrophicum</i> HRM2       | 54                                | <i>D. autotrophicum</i> HRM2                                      | 88       | 39          | 76,38,16         | 93        | 7                | 3*              | 12              | 70 GSC35                    | 5,659     | 6,042,683       | 861          |
| 46      | <i>Desulfobacula toluolica</i> Tol2              | 65                                | -                                                                 | -        | 47          | 21               | 27        | 3                | 1               | -               | 52 GSC37                    | 2,528     | 2,270,163       | 722          |
| 47      | <i>Desulfobulbus propionica</i> 1pr3             | 59                                | <i>Desulfobulbus japonicus</i>                                    | 83       | 48          | 72               | 68        | 1                | 1               | -               | 57 GSC41                    | 2,397     | 2,382,941       | 491          |
| 48      | <i>Desulfotalea psychrophila</i> LSV54           | 60                                | -                                                                 | -        | 43          | 21               | 59        | 1                | 1               | -               | 58 GSC41                    | 2,229     | 2,096,970       | 552          |
| 49      | <i>Desulfocapsa sulfexigens</i> SB164P1          | 74                                | -                                                                 | -        | 45          | 16               | 53        | 3                | 1               | -               | 59 GSC40                    | 1,775     | 1,684,524       | 476          |
| 50      | uncultured bacterium (gcode 4)                   | 46                                | -                                                                 | -        | 23          | 21               | 10        | 0                | 1               | -               | 47 GSC2                     | 539       | 484,216         | 145          |
| 51      | <i>Ignavibacterium album</i> Mat9-16             | 43                                | -                                                                 | -        | 55          | 15               | 12        | -                | 1               | -               | 43 GSC33                    | 1,125     | 1,037,969       | 322          |
| 52      | (Virus-associated)                               | -                                 | -                                                                 | -        | 40          | 44               | -         | -                | -               | -               | -                           | 11,444    | 7,892,159       | 1,225        |
| -       | (Unbinned)                                       | -                                 | -                                                                 | -        | -           | -                | -         | -                | -               | -               | -                           | 59,689    | 53,523,903      | 16,518       |

Abbreviations: Phylogenetic (phylog.); average amino acid identity (AAI); ID (identity); core genes (CGs); coding DNA sequence (CDS). Bacteria bins are: Gammaproteobacteria (green), Alphaproteobacteria (yellow), Deltaproteobacteria (blue), Bacteroidetes (pink), and unclassified Bacteria (grey). AAI are given for comparisons between genome bins and: <sup>1</sup>the nearest related reference genome, or <sup>2</sup>the nearest related genome bin. Phylogenetically clustered genomes share AAIs of ≥60%, while un-clustered bins share <60% AAI with any other bin. Genome completion estimates are based on the percentage of 107 unique CGs present, without correction for co-binning. Bins estimated to be ≥50% complete are highlighted in purple. Co-binned genomes are clearly indicated by: \*the detection of ≥2 compositionally similar genomes using ESOM with imprecise separation of contigs based on coverage; and are suggested by \*\*the presence of surplus CG copies in a bin, which are typically present in a genome as single copy genes.

**Table S3. Pearson's correlations between distance and (hydro)carbon concentrations or genome coverage.**

|                              | Distance                         |         | Distance                          |         |
|------------------------------|----------------------------------|---------|-----------------------------------|---------|
|                              | Correlation coefficient (linear) | P-value | Correlation coeff. (exponential*) | P-value |
| Total_petroleum_hydrocarbons | -0.17                            | 1.00    | 0.03                              | 1.00    |
| Aromatics                    | -0.40                            | 1.00    | NaN                               | NaN     |
| Alkanes                      | -0.39                            | 1.00    | -0.15                             | 1.00    |
| PAHs                         | -0.26                            | 1.00    | -0.10                             | 1.00    |
| Branched_alkanes             | 0.15                             | 1.00    | 0.08                              | 1.00    |
| Cyclic_alkanes               | 0.07                             | 1.00    | 0.16                              | 1.00    |
| Other_petroleum_hydrocarbons | 0.22                             | 1.00    | NaN                               | NaN     |
| Carbon                       | -0.61                            | 0.17    | -0.73                             | 0.02    |
| GSC1                         | -0.33                            | 1.00    | -0.82                             | 0.01    |
| GSC2                         | -0.41                            | 1.00    | -0.80                             | 0.02    |
| GSC3                         | -0.51                            | 1.00    | -0.82                             | 0.01    |
| GSC4                         | -0.37                            | 1.00    | -0.82                             | 0.01    |
| GSC5                         | -0.37                            | 1.00    | -0.80                             | 0.02    |
| GSC6                         | -0.44                            | 1.00    | -0.82                             | 0.01    |
| GSC7                         | -0.51                            | 1.00    | -0.52                             | 0.14    |
| GSC8                         | -0.40                            | 1.00    | -0.86                             | 0.01    |
| GSC9                         | -0.78                            | 0.08    | -0.95                             | 0.00    |
| GSC10                        | -0.52                            | 1.00    | -0.91                             | 0.00    |
| GSC11                        | -0.49                            | 1.00    | -0.87                             | 0.00    |
| GSC12                        | -0.65                            | 0.62    | -0.85                             | 0.01    |
| GSC13                        | -0.69                            | 0.36    | -0.89                             | 0.00    |
| GSC14                        | -0.68                            | 0.44    | -0.85                             | 0.01    |
| GSC15                        | -0.77                            | 0.11    | -0.84                             | 0.01    |
| GSC16                        | -0.73                            | 0.22    | -0.91                             | 0.00    |
| GSC17                        | -0.38                            | 1.00    | -0.51                             | 0.14    |
| GSC18                        | -0.44                            | 1.00    | -0.76                             | 0.02    |
| GSC19                        | -0.72                            | 0.26    | -0.77                             | 0.02    |
| GSC20                        | -0.49                            | 1.00    | -0.82                             | 0.01    |
| GSC21                        | -0.58                            | 1.00    | -0.84                             | 0.01    |
| GSC22                        | -0.74                            | 0.18    | -0.81                             | 0.02    |
| GSC3                         | -0.69                            | 0.39    | -0.88                             | 0.00    |
| GSC24                        | -0.32                            | 1.00    | -0.76                             | 0.02    |
| GSC25                        | -0.59                            | 0.99    | -0.94                             | 0.00    |
| GSC26                        | -0.63                            | 0.74    | -0.89                             | 0.00    |
| GSC27                        | -0.75                            | 0.15    | -0.89                             | 0.00    |
| GSC28                        | -0.87                            | 0.01    | -0.80                             | 0.02    |
| GSC29                        | -0.62                            | 0.76    | -0.91                             | 0.00    |
| GSC30                        | -0.59                            | 1.00    | -0.90                             | 0.00    |
| GSC31                        | -0.50                            | 1.00    | -0.82                             | 0.01    |
| GSC32                        | -0.65                            | 0.62    | -0.85                             | 0.01    |
| GSC33                        | -0.27                            | 1.00    | -0.63                             | 0.07    |
| GSC34                        | -0.85                            | 0.01    | -0.82                             | 0.01    |
| GSC35                        | -0.40                            | 1.00    | -0.82                             | 0.01    |
| GSC36                        | -0.46                            | 1.00    | -0.81                             | 0.02    |
| GSC37                        | -0.45                            | 1.00    | -0.84                             | 0.01    |
| GSC38                        | -0.51                            | 1.00    | -0.82                             | 0.01    |
| GSC39                        | -0.38                            | 1.00    | -0.81                             | 0.02    |
| GSC40                        | -0.44                            | 1.00    | -0.78                             | 0.02    |
| GSC41                        | -0.41                            | 1.00    | -0.75                             | 0.02    |
| GSC42                        | -0.51                            | 1.00    | -0.87                             | 0.00    |
| GSC43                        | -0.65                            | 0.62    | -0.89                             | 0.00    |
| GSC44                        | -0.66                            | 0.56    | -0.77                             | 0.02    |
| GSC45                        | -0.64                            | 0.65    | -0.70                             | 0.03    |
| GSC46                        | -0.81                            | 0.04    | -0.88                             | 0.00    |
| GSC47                        | -0.65                            | 0.61    | -0.90                             | 0.00    |
| GSC48                        | -0.48                            | 1.00    | -0.75                             | 0.02    |
| GSC49                        | -0.42                            | 1.00    | -0.82                             | 0.01    |
| GSC50                        | -0.58                            | 1.00    | -0.72                             | 0.03    |
| GSC51                        | -0.52                            | 1.00    | -0.88                             | 0.00    |

Values with significant p-values ( $\leq 0.05$ ) are highlighted in yellow.

Correlations were determined using the R psych package, and p-values were adjusted for multiple tests using the "hommel" method.

\*Linear correlation following log transformation of data.

**Table S4. Percentage of contigs with mapped reads at each site.**

| GSC | Co  | 0.3 | 0.5 | 0.6 | 0.7 | 0.9 | 1.1 | 2.7 | 10.1 | 15.1 | 24.8 | 33.9 | 48.8 | 59.5 | Min* | Min* | Min* |
|-----|-----|-----|-----|-----|-----|-----|-----|-----|------|------|------|------|------|------|------|------|------|
| 1   | 100 | 100 | 100 | 100 | 100 | 100 | 100 | 100 | 93   | 92   | 90   | 91   | 92   | 90   | 90   | 100  | 90   |
| 2   | 100 | 100 | 100 | 100 | 100 | 100 | 100 | 100 | 93   | 93   | 83   | 88   | 83   | 90   | 83   | 100  | 83   |
| 3   | 100 | 100 | 100 | 100 | 100 | 100 | 99  | 100 | 96   | 94   | 93   | 91   | 93   | 89   | 89   | 99   | 89   |
| 4   | 100 | 100 | 100 | 100 | 100 | 100 | 100 | 100 | 100  | 99   | 98   | 100  | 99   | 93   | 93   | 100  | 93   |
| 5   | 100 | 100 | 100 | 100 | 100 | 100 | 100 | 100 | 100  | 100  | 100  | 100  | 100  | 100  | 100  | 100  | 100  |
| 6   | 100 | 100 | 100 | 100 | 100 | 100 | 98  | 100 | 98   | 95   | 95   | 96   | 97   | 87   | 87   | 98   | 87   |
| 7   | 100 | 100 | 100 | 100 | 100 | 100 | 100 | 100 | 100  | 100  | 100  | 100  | 100  | 100  | 100  | 100  | 100  |
| 8   | 100 | 100 | 100 | 100 | 100 | 100 | 100 | 100 | 99   | 99   | 97   | 98   | 94   | 98   | 94   | 100  | 94   |
| 9   | 100 | 100 | 100 | 100 | 100 | 100 | 100 | 100 | 100  | 100  | 100  | 100  | 99   | 99   | 99   | 100  | 99   |
| 10  | 100 | 100 | 100 | 100 | 100 | 100 | 100 | 100 | 100  | 100  | 98   | 100  | 91   | 98   | 91   | 100  | 91   |
| 11  | 100 | 100 | 100 | 100 | 100 | 100 | 100 | 100 | 100  | 100  | 99   | 100  | 98   | 95   | 95   | 100  | 95   |
| 12  | 100 | 100 | 100 | 100 | 100 | 100 | 100 | 100 | 100  | 100  | 100  | 100  | 100  | 100  | 100  | 100  | 100  |
| 13  | 100 | 100 | 100 | 100 | 100 | 100 | 100 | 100 | 99   | 99   | 98   | 99   | 98   | 94   | 94   | 100  | 94   |
| 14  | 100 | 100 | 100 | 100 | 100 | 100 | 100 | 100 | 100  | 100  | 100  | 100  | 100  | 96   | 96   | 100  | 96   |
| 15  | 100 | 100 | 100 | 100 | 100 | 100 | 100 | 100 | 100  | 100  | 100  | 100  | 100  | 97   | 97   | 100  | 97   |
| 16  | 100 | 100 | 100 | 100 | 100 | 100 | 100 | 100 | 100  | 100  | 97   | 100  | 97   | 85   | 85   | 100  | 85   |
| 17  | 100 | 100 | 100 | 100 | 100 | 100 | 100 | 100 | 100  | 100  | 100  | 99   | 100  | 90   | 90   | 100  | 90   |
| 18  | 100 | 98  | 100 | 100 | 99  | 100 | 100 | 100 | 93   | 92   | 87   | 90   | 89   | 83   | 83   | 98   | 83   |
| 19  | 100 | 100 | 100 | 100 | 100 | 100 | 100 | 100 | 100  | 100  | 100  | 100  | 100  | 96   | 96   | 100  | 96   |
| 20  | 100 | 100 | 100 | 100 | 100 | 100 | 96  | 100 | 98   | 100  | 75   | 81   | 73   | 65   | 65   | 96   | 65   |
| 21  | 100 | 100 | 100 | 100 | 100 | 100 | 100 | 100 | 100  | 100  | 97   | 94   | 90   | 85   | 85   | 100  | 85   |
| 22  | 100 | 100 | 100 | 100 | 100 | 100 | 100 | 100 | 100  | 100  | 100  | 100  | 100  | 97   | 97   | 100  | 97   |
| 23  | 100 | 100 | 100 | 100 | 100 | 100 | 100 | 100 | 100  | 100  | 95   | 98   | 89   | 77   | 77   | 100  | 77   |
| 24  | 100 | 100 | 100 | 100 | 100 | 100 | 100 | 100 | 99   | 99   | 98   | 100  | 100  | 86   | 86   | 100  | 86   |
| 25  | 100 | 100 | 100 | 100 | 100 | 100 | 100 | 100 | 100  | 100  | 98   | 100  | 98   | 77   | 77   | 100  | 77   |
| 26  | 100 | 100 | 100 | 100 | 100 | 100 | 100 | 100 | 100  | 100  | 97   | 96   | 92   | 76   | 76   | 100  | 76   |
| 27  | 100 | 100 | 100 | 100 | 100 | 100 | 100 | 100 | 100  | 100  | 100  | 99   | 99   | 84   | 84   | 100  | 84   |
| 28  | 100 | 100 | 100 | 100 | 100 | 100 | 100 | 100 | 100  | 100  | 100  | 100  | 100  | 92   | 92   | 100  | 92   |
| 29  | 100 | 100 | 100 | 100 | 100 | 100 | 100 | 100 | 100  | 100  | 100  | 95   | 88   | 82   | 82   | 100  | 82   |
| 30  | 100 | 100 | 100 | 100 | 100 | 100 | 100 | 100 | 100  | 100  | 100  | 100  | 100  | 99   | 99   | 100  | 99   |
| 31  | 100 | 100 | 100 | 100 | 100 | 100 | 100 | 100 | 100  | 100  | 96   | 100  | 96   | 86   | 86   | 100  | 86   |
| 32  | 100 | 100 | 100 | 100 | 100 | 100 | 100 | 100 | 100  | 100  | 100  | 100  | 100  | 98   | 98   | 100  | 98   |
| 33  | 100 | 100 | 98  | 98  | 100 | 97  | 96  | 96  | 94   | 94   | 89   | 89   | 86   | 84   | 84   | 96   | 84   |
| 34  | 100 | 100 | 100 | 100 | 100 | 100 | 100 | 100 | 100  | 100  | 100  | 100  | 100  | 100  | 100  | 100  | 100  |
| 35  | 100 | 100 | 100 | 100 | 100 | 100 | 100 | 100 | 89   | 89   | 88   | 91   | 89   | 88   | 88   | 100  | 88   |
| 36  | 100 | 100 | 100 | 100 | 100 | 100 | 100 | 100 | 89   | 94   | 92   | 92   | 89   | 89   | 89   | 100  | 89   |
| 37  | 100 | 100 | 100 | 100 | 100 | 100 | 99  | 100 | 79   | 83   | 73   | 82   | 76   | 68   | 68   | 99   | 68   |
| 38  | 100 | 100 | 100 | 100 | 100 | 100 | 99  | 100 | 72   | 81   | 65   | 80   | 82   | 63   | 63   | 99   | 63   |
| 39  | 100 | 100 | 100 | 100 | 100 | 100 | 99  | 100 | 85   | 89   | 84   | 85   | 86   | 83   | 83   | 99   | 83   |
| 40  | 100 | 100 | 100 | 100 | 100 | 100 | 100 | 100 | 87   | 93   | 75   | 79   | 99   | 54   | 54   | 100  | 54   |
| 41  | 100 | 100 | 100 | 100 | 94  | 100 | 92  | 100 | 74   | 79   | 61   | 78   | 66   | 59   | 59   | 92   | 59   |
| 42  | 100 | 100 | 100 | 100 | 100 | 100 | 100 | 100 | 99   | 99   | 98   | 99   | 98   | 95   | 95   | 100  | 95   |
| 43  | 100 | 100 | 100 | 100 | 100 | 100 | 100 | 100 | 99   | 100  | 98   | 100  | 98   | 96   | 96   | 100  | 96   |
| 44  | 100 | 100 | 100 | 100 | 100 | 100 | 100 | 100 | 100  | 100  | 100  | 100  | 100  | 100  | 100  | 100  | 100  |
| 45  | 100 | 100 | 100 | 100 | 100 | 100 | 100 | 100 | 100  | 100  | 100  | 100  | 100  | 100  | 100  | 100  | 100  |
| 46  | 100 | 100 | 100 | 100 | 100 | 100 | 100 | 100 | 100  | 100  | 100  | 100  | 100  | 99   | 99   | 100  | 99   |
| 47  | 100 | 100 | 100 | 100 | 100 | 100 | 100 | 100 | 94   | 95   | 90   | 94   | 88   | 81   | 81   | 100  | 81   |
| 48  | 100 | 100 | 100 | 100 | 100 | 100 | 100 | 100 | 96   | 95   | 95   | 96   | 93   | 89   | 89   | 100  | 89   |
| 49  | 100 | 100 | 100 | 100 | 100 | 100 | 95  | 100 | 94   | 91   | 86   | 86   | 86   | 72   | 72   | 95   | 72   |
| 50  | 100 | 100 | 100 | 99  | 100 | 100 | 98  | 100 | 99   | 100  | 98   | 97   | 98   | 93   | 93   | 98   | 93   |
| 51  | 100 | 100 | 100 | 100 | 100 | 100 | 97  | 100 | 85   | 82   | 73   | 94   | 82   | 72   | 72   | 97   | 72   |

\*Minimum % of contigs detected across all, proximal or distal sites. Abbreviation: Co-assembly, Co.



**Table S5. Average mapped-read genome bin coverages per site.**

| GSC                 | Co     | 0.3    | 0.5    | 0.6   | 0.7    | 0.9    | 1.1   | 2.7   | 10.1  | 15.1  | 24.8  | 33.9  | 48.8  | 59.5 | Cnt* | Cnt* | Cnt* |
|---------------------|--------|--------|--------|-------|--------|--------|-------|-------|-------|-------|-------|-------|-------|------|------|------|------|
| 1                   | 156.34 | 11.91  | 20.29  | 9.42  | 175.76 | 10.64  | 1.19  | 41.16 | 0.53  | 0.53  | 0.30  | 0.46  | 0.37  | 0.28 | 7    | 7    | 0    |
| 2                   | 46.28  | 9.04   | 16.73  | 4.62  | 69.15  | 17.44  | 0.79  | 18.54 | 0.38  | 0.48  | 0.30  | 0.52  | 0.57  | 0.41 | 6    | 6    | 0    |
| 3                   | 22.97  | 6.02   | 11.13  | 1.60  | 6.96   | 17.91  | 0.67  | 4.74  | 0.49  | 0.61  | 0.37  | 0.50  | 0.41  | 0.31 | 6    | 6    | 0    |
| 4                   | 89.61  | 14.24  | 100.23 | 7.16  | 16.64  | 14.11  | 2.32  | 20.47 | 2.60  | 2.74  | 0.90  | 2.11  | 1.50  | 0.53 | 11   | 7    | 4    |
| 5                   | 37.88  | 10.30  | 50.57  | 4.94  | 7.61   | 7.23   | 2.30  | 8.99  | 2.78  | 2.89  | 1.16  | 2.24  | 1.45  | 1.04 | 13   | 7    | 6    |
| 6                   | 17.92  | 6.09   | 26.97  | 3.21  | 6.44   | 4.97   | 1.34  | 8.40  | 1.42  | 1.51  | 0.60  | 1.12  | 0.98  | 0.34 | 10   | 7    | 3    |
| 7                   | 78.19  | 15.45  | 46.32  | 18.25 | 27.30  | 44.37  | 13.77 | 16.34 | 19.61 | 27.18 | 9.99  | 30.35 | 10.87 | 1.76 | 13   | 7    | 6    |
| 8                   | 41.80  | 17.88  | 64.39  | 7.34  | 7.37   | 8.13   | 3.44  | 15.43 | 2.20  | 2.02  | 0.86  | 1.46  | 0.69  | 1.37 | 11   | 7    | 4    |
| 9                   | 26.37  | 29.16  | 23.48  | 27.07 | 13.70  | 13.20  | 26.02 | 13.85 | 7.08  | 5.24  | 1.94  | 2.30  | 0.89  | 0.87 | 11   | 7    | 4    |
| 10                  | 22.00  | 42.91  | 34.75  | 12.97 | 6.34   | 7.54   | 3.88  | 17.77 | 1.94  | 1.62  | 0.57  | 1.63  | 0.46  | 0.72 | 10   | 7    | 3    |
| 11                  | 348.42 | 101.31 | 418.61 | 57.84 | 112.94 | 143.09 | 30.56 | 95.28 | 25.54 | 21.87 | 4.37  | 15.02 | 7.35  | 1.48 | 13   | 7    | 6    |
| 12                  | 150.44 | 81.35  | 216.21 | 82.18 | 71.33  | 120.43 | 57.47 | 53.86 | 51.28 | 47.49 | 12.92 | 27.63 | 16.36 | 4.29 | 13   | 7    | 6    |
| 13                  | 28.87  | 56.78  | 123.45 | 47.00 | 48.42  | 68.10  | 34.11 | 42.93 | 27.57 | 20.71 | 5.68  | 14.44 | 6.40  | 2.21 | 13   | 7    | 6    |
| 14                  | 47.07  | 22.66  | 29.28  | 15.42 | 25.43  | 44.62  | 7.62  | 13.94 | 9.60  | 10.78 | 2.58  | 5.39  | 2.19  | 0.83 | 12   | 7    | 5    |
| 15                  | 26.60  | 18.67  | 22.29  | 31.28 | 16.14  | 20.67  | 34.17 | 8.02  | 22.77 | 10.13 | 2.11  | 4.32  | 1.86  | 0.98 | 12   | 7    | 5    |
| 16                  | 52.94  | 16.59  | 25.04  | 17.13 | 32.89  | 25.22  | 9.01  | 13.94 | 4.08  | 5.45  | 0.96  | 3.27  | 1.10  | 0.40 | 11   | 7    | 4    |
| 17                  | 16.66  | 8.74   | 8.51   | 12.72 | 8.15   | 7.25   | 28.79 | 1.96  | 43.91 | 25.97 | 5.01  | 1.13  | 1.09  | 0.52 | 12   | 7    | 5    |
| 18                  | 30.11  | 2.78   | 35.94  | 5.07  | 3.87   | 11.24  | 5.45  | 29.97 | 1.10  | 1.24  | 0.64  | 1.03  | 0.77  | 0.58 | 10   | 7    | 3    |
| 19                  | 21.06  | 10.81  | 11.06  | 8.15  | 11.77  | 17.84  | 6.80  | 8.05  | 5.90  | 6.58  | 2.23  | 6.49  | 4.36  | 1.07 | 13   | 7    | 6    |
| 20                  | 19.34  | 2.60   | 5.62   | 1.74  | 14.10  | 9.28   | 0.75  | 2.58  | 0.77  | 1.34  | 0.27  | 0.48  | 0.28  | 0.21 | 7    | 6    | 1    |
| 21                  | 24.20  | 6.97   | 20.74  | 5.56  | 5.18   | 16.14  | 3.24  | 17.67 | 1.94  | 3.15  | 0.75  | 1.17  | 0.80  | 0.66 | 10   | 7    | 3    |
| 22                  | 29.30  | 18.05  | 20.42  | 13.26 | 11.45  | 28.64  | 12.74 | 9.30  | 9.46  | 11.73 | 2.36  | 7.82  | 2.89  | 0.95 | 12   | 7    | 5    |
| 23                  | 25.50  | 9.92   | 15.45  | 7.68  | 18.31  | 9.89   | 3.48  | 4.74  | 3.76  | 5.20  | 0.61  | 1.41  | 0.47  | 0.28 | 10   | 7    | 3    |
| 24                  | 71.72  | 5.24   | 12.02  | 7.82  | 89.89  | 3.05   | 8.40  | 11.78 | 1.40  | 1.65  | 0.71  | 2.54  | 1.71  | 0.39 | 11   | 7    | 4    |
| 25                  | 99.93  | 28.70  | 66.12  | 29.01 | 40.05  | 30.34  | 4.15  | 10.52 | 2.58  | 2.69  | 0.60  | 1.68  | 0.75  | 0.33 | 10   | 7    | 3    |
| 26                  | 18.46  | 7.06   | 11.36  | 5.20  | 15.40  | 6.41   | 1.71  | 4.01  | 1.66  | 3.14  | 0.53  | 0.71  | 0.39  | 0.22 | 9    | 7    | 2    |
| 27                  | 23.41  | 7.49   | 12.56  | 6.67  | 13.54  | 9.50   | 3.83  | 4.95  | 5.02  | 3.67  | 0.93  | 1.24  | 0.79  | 0.41 | 10   | 7    | 3    |
| 28                  | 16.21  | 9.65   | 10.49  | 8.64  | 12.17  | 8.90   | 6.84  | 5.44  | 6.86  | 7.36  | 2.00  | 3.76  | 1.92  | 0.43 | 12   | 7    | 5    |
| 29                  | 20.22  | 4.82   | 18.78  | 7.10  | 10.75  | 4.96   | 6.54  | 2.75  | 3.67  | 2.59  | 0.72  | 0.56  | 0.37  | 0.30 | 9    | 7    | 2    |
| 30                  | 33.65  | 8.19   | 20.39  | 7.60  | 15.73  | 7.18   | 4.40  | 4.84  | 1.34  | 1.62  | 0.66  | 1.94  | 1.72  | 0.44 | 11   | 7    | 4    |
| 31                  | 17.84  | 3.84   | 16.05  | 2.72  | 7.35   | 6.09   | 1.41  | 3.94  | 1.34  | 2.11  | 0.59  | 1.26  | 0.74  | 0.61 | 10   | 7    | 3    |
| 32                  | 25.97  | 5.40   | 11.63  | 5.42  | 14.74  | 9.79   | 3.00  | 4.75  | 3.46  | 3.22  | 0.96  | 2.07  | 1.43  | 0.53 | 11   | 7    | 4    |
| 33                  | 19.60  | 3.94   | 1.15   | 0.60  | 22.51  | 0.73   | 0.50  | 0.54  | 0.45  | 0.53  | 0.33  | 0.46  | 0.36  | 0.32 | 3    | 3    | 0    |
| 34                  | 20.86  | 12.59  | 9.76   | 11.21 | 9.98   | 7.80   | 10.36 | 4.05  | 8.94  | 7.97  | 3.96  | 3.49  | 1.84  | 0.97 | 12   | 7    | 5    |
| 35                  | 45.36  | 4.20   | 21.86  | 1.61  | 47.07  | 12.78  | 0.65  | 3.84  | 0.22  | 0.27  | 0.19  | 0.30  | 0.23  | 0.22 | 6    | 6    | 0    |
| 36                  | 24.40  | 5.76   | 11.69  | 1.15  | 26.99  | 8.37   | 0.46  | 7.21  | 0.19  | 0.24  | 0.22  | 0.25  | 0.25  | 0.21 | 6    | 6    | 0    |
| 37                  | 39.09  | 5.56   | 37.45  | 2.10  | 15.81  | 14.15  | 0.65  | 7.09  | 0.27  | 0.34  | 0.20  | 0.34  | 0.25  | 0.20 | 6    | 6    | 0    |
| 38                  | 21.17  | 7.06   | 33.58  | 3.53  | 16.89  | 13.55  | 0.81  | 16.96 | 0.32  | 0.45  | 0.31  | 0.45  | 0.47  | 0.31 | 6    | 6    | 0    |
| 39                  | 71.88  | 15.51  | 89.69  | 3.60  | 9.83   | 22.23  | 0.85  | 17.91 | 0.44  | 0.53  | 0.39  | 0.56  | 0.56  | 0.53 | 6    | 6    | 0    |
| 40                  | 20.67  | 3.55   | 26.31  | 1.92  | 7.80   | 6.51   | 0.72  | 14.04 | 0.32  | 0.48  | 0.23  | 0.35  | 0.80  | 0.17 | 6    | 6    | 0    |
| 41                  | 15.91  | 1.75   | 9.16   | 2.46  | 0.88   | 15.79  | 0.43  | 3.48  | 0.29  | 0.39  | 0.21  | 0.39  | 0.27  | 0.22 | 5    | 5    | 0    |
| 42                  | 33.78  | 11.72  | 38.18  | 7.34  | 19.38  | 9.20   | 2.55  | 10.61 | 1.33  | 1.58  | 0.63  | 2.67  | 0.85  | 0.42 | 10   | 7    | 3    |
| 43                  | 20.40  | 10.86  | 14.42  | 5.25  | 15.20  | 10.34  | 1.89  | 7.59  | 1.64  | 1.69  | 0.84  | 1.84  | 0.98  | 0.53 | 10   | 7    | 3    |
| 44                  | 25.95  | 17.90  | 35.23  | 15.57 | 25.75  | 22.91  | 7.58  | 17.37 | 9.16  | 8.97  | 2.90  | 12.76 | 6.13  | 1.60 | 13   | 7    | 6    |
| 45                  | 19.00  | 11.55  | 15.66  | 8.97  | 15.46  | 9.94   | 5.75  | 10.92 | 6.88  | 6.68  | 3.12  | 11.62 | 4.86  | 1.68 | 13   | 7    | 6    |
| 46                  | 17.69  | 14.33  | 13.49  | 13.24 | 13.44  | 9.26   | 6.90  | 4.63  | 7.54  | 6.96  | 1.91  | 3.05  | 1.48  | 0.72 | 12   | 7    | 5    |
| 47                  | 15.96  | 10.15  | 12.26  | 5.89  | 5.73   | 10.53  | 0.88  | 7.91  | 0.47  | 0.58  | 0.30  | 0.63  | 0.32  | 0.23 | 6    | 6    | 0    |
| 48                  | 18.18  | 1.28   | 14.12  | 1.88  | 3.95   | 8.21   | 0.64  | 8.15  | 0.41  | 0.46  | 0.28  | 0.55  | 0.32  | 0.25 | 6    | 6    | 0    |
| 49                  | 18.70  | 3.81   | 19.24  | 1.42  | 4.99   | 4.64   | 0.34  | 3.54  | 0.38  | 0.37  | 0.20  | 0.39  | 0.26  | 0.15 | 6    | 6    | 0    |
| 50                  | 20.66  | 11.41  | 18.08  | 2.44  | 11.12  | 15.13  | 0.64  | 14.61 | 1.76  | 1.64  | 0.92  | 1.00  | 1.36  | 0.66 | 10   | 6    | 4    |
| 51                  | 15.24  | 7.37   | 6.46   | 3.28  | 12.88  | 3.20   | 0.70  | 2.08  | 0.43  | 0.44  | 0.21  | 0.79  | 0.36  | 0.29 | 6    | 6    | 0    |
| Average             | 43     | 15     | 38     | 11    | 24     | 19     | 7     | 13    | 6     | 6     | 2     | 4     | 2     | 1    |      |      |      |
| Standard Deviation  | 53     | 19     | 65     | 15    | 31     | 26     | 11    | 16    | 11    | 9     | 2     | 6     | 3     | 1    |      |      |      |
| % present out of 51 | 100    | 100    | 100    | 98    | 98     | 98     | 69    | 98    | 69    | 71    | 31    | 65    | 41    | 18   |      |      |      |

\*Genome counts (Cnt) across all, proximal or distal sites based on an average coverage of >=1.

Abbreviation: Co-assembly, Co.





**Table S8. Summary of candidate hydrocarbon degradation genes distributed among 25 bacterial genome bins, GSC52 and the unbinmed fraction.**

| Predicted protein                                                            | Substrate                    | GSC4     | GSC5     | GSC6     | GSC7     | GSC8     | GSC9      | GSC10    | GSC14    | GSC15     | GSC16     | GSC18    | GSC19    | GSC20    | GSC21     | GSC22     | GSC24    | GSC26    | GSC30    | GSC35    | GSC37    | GSC42    | GSC43    | GSC46    | GSC48    | GSC49    | GSC52    | unbinmed  | Sum        |
|------------------------------------------------------------------------------|------------------------------|----------|----------|----------|----------|----------|-----------|----------|----------|-----------|-----------|----------|----------|----------|-----------|-----------|----------|----------|----------|----------|----------|----------|----------|----------|----------|----------|----------|-----------|------------|
| Transmembrane alkane 1-monoxygenase AlkB                                     | n-alkanes                    | 0        | 1        | 1        | 1        | 0        | 4         | 0        | 0        | 2         | 2         | 0        | 0        | 1        | 0         | 2         | 2        | 1        | 2        | 0        | 0        | 1        | 1        | 1        | 0        | 0        | 0        | 6         |            |
| Alkane-1 monoxygenase accessory--Rubredoxin-2 AlkG                           | n-alkanes                    | 0        | 1        | 1        | 1        | 0        | 0         | 0        | 0        | 0         | 0         | 0        | 0        | 0        | 0         | 0         | 1        | 0        | 0        | 0        | 0        | 0        | 0        | 0        | 0        | 0        | 0        | 2         |            |
| Alkane-1 monoxygenase accessory--Rubredoxin-2 RubB/RubA2                     | n-alkanes                    | 0        | 0        | 0        | 1        | 0        | 0         | 0        | 0        | 0         | 0         | 0        | 0        | 0        | 0         | 0         | 0        | 0        | 0        | 0        | 0        | 0        | 0        | 0        | 0        | 0        | 0        | 1         |            |
| Alkane-1 monoxygenase accessory--Rubredoxin-NAD(+) reductase AlkT            | n-alkanes                    | 0        | 0        | 0        | 0        | 0        | 0         | 0        | 0        | 0         | 0         | 0        | 0        | 0        | 0         | 0         | 1        | 0        | 0        | 0        | 0        | 0        | 0        | 0        | 0        | 0        | 0        | 1         | 38         |
| Cytochrome P450 accessory:2Fe-2S ferredoxin                                  | n-alkanes                    | 0        | 0        | 0        | 0        | 0        | 0         | 0        | 0        | 0         | 0         | 0        | 0        | 0        | 0         | 1         | 0        | 0        | 0        | 0        | 0        | 0        | 0        | 0        | 0        | 0        | 0        | 0         |            |
| Cytochrome P450 accessory:Ferredoxin reductase--Rubredoxin-NAD(+) reductase  | n-alkanes                    | 0        | 0        | 0        | 0        | 0        | 0         | 0        | 1        | 0         | 0         | 0        | 0        | 0        | 0         | 0         | 0        | 0        | 0        | 0        | 0        | 0        | 0        | 0        | 0        | 0        | 0        | 0         |            |
| Cytochrome P450--CYPX_CD_Family--CYP153_gene                                 | n-alkanes                    | 1        | 3        | 0        | 0        | 0        | 0         | 1        | 0        | 3         | 0         | 9        | 0        | 0        | 1         | 0         | 0        | 0        | 0        | 0        | 0        | 0        | 0        | 0        | 0        | 0        | 0        | 20        |            |
| Soluble methane monoxygenase hydroxylase component A alpha-subunit MmoX      | methane, ammonium, n-alkanes | 0        | 0        | 0        | 0        | 0        | 0         | 0        | 0        | 0         | 0         | 0        | 0        | 0        | 1         | 0         | 0        | 0        | 0        | 0        | 0        | 0        | 0        | 0        | 0        | 0        | 0        | 0         |            |
| Soluble methane monoxygenase hydroxylase component A beta-subunit MmoY       | methane, ammonium, n-alkanes | 0        | 0        | 0        | 0        | 0        | 0         | 0        | 0        | 0         | 0         | 0        | 0        | 0        | 1         | 0         | 0        | 0        | 0        | 0        | 0        | 0        | 0        | 0        | 0        | 0        | 0        | 0         |            |
| Soluble methane monoxygenase hydroxylase component A gamma-subunit MmoZ      | methane, ammonium, n-alkanes | 0        | 0        | 0        | 0        | 0        | 0         | 0        | 0        | 0         | 0         | 0        | 0        | 0        | 1         | 0         | 0        | 0        | 0        | 0        | 0        | 0        | 0        | 0        | 0        | 0        | 0        | 0         |            |
| Soluble methane monoxygenase reductase component C MmoC                      | methane, ammonium, n-alkanes | 0        | 0        | 0        | 0        | 0        | 0         | 0        | 0        | 0         | 0         | 0        | 0        | 0        | 2         | 0         | 0        | 0        | 0        | 0        | 0        | 0        | 0        | 0        | 0        | 0        | 0        | 0         |            |
| Soluble methane monoxygenase regulatory protein B MmoB                       | methane, ammonium, n-alkanes | 0        | 0        | 0        | 0        | 0        | 0         | 0        | 0        | 0         | 0         | 0        | 0        | 0        | 1         | 0         | 0        | 0        | 0        | 0        | 0        | 0        | 0        | 0        | 0        | 0        | 0        | 6         |            |
| Particulate methane monoxygenase subunit A                                   | methane, ammonium, n-alkanes | 0        | 0        | 0        | 1        | 0        | 0         | 1        | 0        | 0         | 2         | 0        | 0        | 1        | 0         | 0         | 0        | 0        | 0        | 0        | 0        | 0        | 0        | 0        | 0        | 0        | 0        | 3         |            |
| Particulate methane monoxygenase subunit B                                   | methane, ammonium, n-alkanes | 0        | 0        | 0        | 1        | 1        | 0         | 1        | 0        | 0         | 1         | 0        | 0        | 1        | 0         | 0         | 0        | 0        | 0        | 0        | 0        | 0        | 0        | 0        | 0        | 0        | 0        | 6         |            |
| Particulate methane monoxygenase subunit C                                   | methane, ammonium, n-alkanes | 0        | 0        | 0        | 3        | 2        | 2         | 0        | 1        | 0         | 2         | 0        | 0        | 2        | 0         | 0         | 0        | 0        | 0        | 0        | 0        | 0        | 0        | 0        | 0        | 0        | 2        | 35        |            |
| Aromatic dioxygenase L                                                       | PAHs                         | 0        | 0        | 0        | 0        | 0        | 0         | 0        | 0        | 0         | 0         | 0        | 0        | 0        | 1         | 0         | 0        | 0        | 0        | 0        | 0        | 0        | 0        | 0        | 0        | 0        | 0        | 0         |            |
| PAH dioxygenase L--Benzene/Biphenyl*                                         | PAHs                         | 0        | 0        | 0        | 0        | 2        | 0         | 0        | 2        | 0         | 0         | 0        | 0        | 0        | 0         | 0         | 0        | 0        | 0        | 0        | 0        | 0        | 0        | 0        | 0        | 0        | 0        | 0         |            |
| PAH dioxygenase L--Benzene/Biphenyl/Pyrene/Naphthalene*                      | PAHs                         | 0        | 0        | 0        | 0        | 0        | 0         | 0        | 0        | 0         | 0         | 0        | 0        | 0        | 1         | 0         | 0        | 0        | 0        | 0        | 0        | 0        | 0        | 0        | 0        | 0        | 0        | 0         |            |
| PAH dioxygenase L--Naphthalene*                                              | PAHs                         | 0        | 0        | 0        | 0        | 4        | 0         | 0        | 8        | 0         | 0         | 0        | 0        | 0        | 6         | 0         | 0        | 0        | 0        | 0        | 0        | 0        | 0        | 0        | 0        | 0        | 0        | 5         |            |
| PAH dioxygenase L--Ortho-halobenzoate/Benzoate/Anthranilate*                 | PAHs                         | 0        | 0        | 0        | 0        | 3        | 0         | 0        | 1        | 0         | 0         | 0        | 0        | 0        | 4         | 0         | 0        | 0        | 0        | 0        | 0        | 0        | 0        | 0        | 0        | 0        | 0        | 2         |            |
| PAH dioxygenase L--Pyrene*                                                   | PAHs                         | 0        | 0        | 0        | 0        | 0        | 0         | 0        | 1        | 0         | 0         | 0        | 0        | 0        | 3         | 0         | 0        | 0        | 0        | 0        | 0        | 0        | 0        | 0        | 0        | 0        | 0        | 1         |            |
| Aromatic dioxygenase S                                                       | PAHs                         | 0        | 0        | 0        | 0        | 1        | 0         | 0        | 0        | 0         | 0         | 0        | 0        | 0        | 0         | 0         | 0        | 0        | 0        | 0        | 0        | 0        | 0        | 0        | 0        | 0        | 0        | 0         |            |
| PAH dioxygenase S--Benzene/Biphenyl*                                         | PAHs                         | 0        | 0        | 0        | 0        | 2        | 0         | 0        | 1        | 0         | 0         | 0        | 0        | 0        | 1         | 0         | 0        | 0        | 0        | 0        | 0        | 0        | 0        | 0        | 0        | 0        | 0        | 0         |            |
| PAH dioxygenase S--Naphthalene*                                              | PAHs                         | 0        | 0        | 0        | 0        | 3        | 0         | 0        | 5        | 0         | 0         | 0        | 0        | 0        | 5         | 0         | 0        | 0        | 0        | 0        | 0        | 0        | 0        | 0        | 0        | 0        | 0        | 4         |            |
| PAH dioxygenase S--Ortho-halobenzoate/Benzoate/Anthranilate*                 | PAHs                         | 0        | 0        | 0        | 0        | 2        | 0         | 0        | 0        | 0         | 0         | 0        | 0        | 0        | 1         | 0         | 0        | 0        | 0        | 0        | 0        | 0        | 0        | 0        | 0        | 0        | 0        | 0         |            |
| PAH dioxygenase S--Pyrene*                                                   | PAHs                         | 0        | 0        | 0        | 0        | 0        | 0         | 0        | 1        | 0         | 0         | 0        | 0        | 0        | 2         | 0         | 0        | 0        | 0        | 0        | 0        | 0        | 0        | 0        | 0        | 0        | 0        | 1         |            |
| PAH dioxygenase electron transfer component--Ferredoxin-NAD(+) reductase     | PAHs                         | 0        | 0        | 0        | 0        | 0        | 0         | 0        | 0        | 0         | 0         | 0        | 0        | 0        | 0         | 0         | 0        | 0        | 0        | 0        | 0        | 0        | 0        | 0        | 0        | 0        | 0        | 1         |            |
| PAH dioxygenase electron transfer component--Rieske (2Fe-2S) ferredoxin      | PAHs                         | 0        | 0        | 0        | 0        | 0        | 1         | 0        | 0        | 0         | 0         | 0        | 0        | 0        | 0         | 0         | 0        | 0        | 0        | 0        | 0        | 0        | 0        | 0        | 0        | 0        | 0        | 74        |            |
| Phenol 2-monoxygenase--CD--FAD-dependent Phenol hydroxylase (PHOX) family    | phenol, benzene, toluene     | 0        | 0        | 0        | 1        | 0        | 0         | 0        | 0        | 0         | 0         | 0        | 0        | 0        | 0         | 0         | 0        | 0        | 0        | 0        | 0        | 0        | 0        | 0        | 0        | 0        | 0        | 0         |            |
| Phenol hydroxylase, P0 assembly protein DmpK/LapK                            | phenol, benzene, toluene     | 0        | 0        | 0        | 0        | 1        | 0         | 0        | 0        | 0         | 0         | 0        | 0        | 0        | 0         | 0         | 0        | 0        | 0        | 0        | 0        | 0        | 0        | 0        | 0        | 0        | 0        | 2         |            |
| Phenol hydroxylase, P1 oxygenase component DmpL                              | phenol, benzene, toluene     | 0        | 0        | 0        | 0        | 3        | 0         | 0        | 0        | 0         | 0         | 0        | 0        | 0        | 0         | 0         | 0        | 0        | 0        | 0        | 0        | 0        | 0        | 0        | 0        | 0        | 0        | 2         |            |
| Phenol hydroxylase, P2 regulatory component DmpM                             | phenol, benzene, toluene     | 0        | 0        | 0        | 0        | 2        | 0         | 0        | 0        | 0         | 0         | 0        | 0        | 0        | 1         | 0         | 0        | 0        | 0        | 0        | 0        | 0        | 0        | 0        | 0        | 0        | 0        | 1         |            |
| Phenol hydroxylase, P3 oxygenase component DmpN                              | phenol, benzene, toluene     | 0        | 0        | 0        | 0        | 2        | 0         | 0        | 0        | 0         | 0         | 0        | 0        | 0        | 1         | 0         | 0        | 0        | 0        | 0        | 0        | 0        | 0        | 0        | 0        | 0        | 0        | 1         |            |
| Phenol hydroxylase, P4 oxygenase component DmpO                              | phenol, benzene, toluene     | 0        | 0        | 0        | 0        | 2        | 0         | 0        | 0        | 0         | 0         | 0        | 0        | 0        | 1         | 0         | 0        | 0        | 0        | 0        | 0        | 0        | 0        | 0        | 0        | 0        | 0        | 0         |            |
| Phenol hydroxylase, FAD- and [2Fe-2S]-containing reductase P5 component DmpP | phenol, benzene, toluene     | 0        | 0        | 0        | 0        | 1        | 0         | 0        | 0        | 0         | 0         | 0        | 0        | 0        | 1         | 0         | 0        | 0        | 0        | 0        | 0        | 0        | 0        | 0        | 0        | 0        | 0        | 0         |            |
| Positive regulator of phenol hydroxylase, DmpR                               | phenol, benzene, toluene     | 0        | 0        | 0        | 0        | 0        | 0         | 0        | 0        | 0         | 0         | 0        | 0        | 0        | 1         | 0         | 0        | 0        | 0        | 0        | 0        | 0        | 0        | 0        | 0        | 0        | 0        | 23        |            |
| Membrane protein involved in aromatic hydrocarbon degradation--CD--Toluene_X | toluene                      | 0        | 1        | 0        | 0        | 2        | 1         | 0        | 0        | 6         | 0         | 0        | 0        | 0        | 1         | 1         | 0        | 0        | 6        | 3        | 3        | 1        | 0        | 1        | 1        | 0        | 4        |           |            |
| Toluene-4-monoxygenase protein_A TmoA                                        | toluene                      | 0        | 0        | 0        | 0        | 1        | 0         | 0        | 0        | 0         | 0         | 0        | 0        | 0        | 0         | 0         | 0        | 0        | 0        | 0        | 0        | 0        | 0        | 0        | 0        | 0        | 0        | 1         |            |
| Toluene-4-monoxygenase protein_B TmoB                                        | toluene                      | 0        | 0        | 0        | 0        | 0        | 0         | 0        | 0        | 0         | 0         | 0        | 0        | 0        | 0         | 0         | 0        | 0        | 0        | 0        | 0        | 0        | 0        | 0        | 0        | 0        | 0        | 1         |            |
| Toluene-4-monoxygenase protein_C TmoC                                        | toluene                      | 0        | 0        | 0        | 0        | 0        | 0         | 0        | 0        | 0         | 0         | 0        | 0        | 0        | 0         | 0         | 0        | 0        | 0        | 0        | 0        | 0        | 0        | 0        | 0        | 0        | 0        | 1         |            |
| Toluene-4-monoxygenase protein_D TmoD                                        | toluene                      | 0        | 0        | 0        | 0        | 0        | 0         | 0        | 0        | 0         | 0         | 0        | 0        | 0        | 0         | 0         | 0        | 0        | 0        | 0        | 0        | 0        | 0        | 0        | 0        | 0        | 0        | 1         |            |
| Toluene-4-monoxygenase protein_E TmoE                                        | toluene                      | 0        | 0        | 0        | 0        | 0        | 0         | 0        | 0        | 0         | 0         | 0        | 0        | 0        | 0         | 0         | 0        | 0        | 0        | 0        | 0        | 0        | 0        | 0        | 0        | 0        | 0        | 1         |            |
| Toluene-4-monoxygenase electron transfer component TmoF                      | toluene                      | 0        | 0        | 0        | 0        | 0        | 1         | 0        | 0        | 0         | 0         | 0        | 0        | 0        | 0         | 0         | 0        | 0        | 0        | 0        | 0        | 0        | 0        | 0        | 0        | 0        | 0        | 1         | 39         |
| Xylene monoxygenase electron transfer component XylA                         | xylenes, toluene             | 0        | 0        | 0        | 0        | 2        | 0         | 0        | 3        | 0         | 0         | 0        | 0        | 0        | 2         | 0         | 0        | 0        | 0        | 0        | 0        | 0        | 0        | 0        | 0        | 0        | 0        | 2         |            |
| Xylene monoxygenase hydroxylase subunit XylM                                 | xylenes, toluene             | 0        | 0        | 0        | 0        | 2        | 0         | 0        | 2        | 0         | 0         | 0        | 0        | 0        | 1         | 1         | 0        | 0        | 0        | 0        | 0        | 0        | 0        | 0        | 0        | 0        | 0        | 5         | 20         |
| Ethylbenzene dehydrogenase alpha subunit EbdA                                | toluene (anaerobic)          | 0        | 0        | 0        | 0        | 0        | 0         | 0        | 0        | 0         | 0         | 0        | 0        | 0        | 0         | 0         | 0        | 0        | 0        | 0        | 0        | 0        | 0        | 0        | 0        | 0        | 0        | 2         |            |
| Ethylbenzene dehydrogenase beta subunit EbdB                                 | toluene (anaerobic)          | 0        | 0        | 0        | 0        | 0        | 0         | 0        | 0        | 0         | 0         | 0        | 0        | 0        | 0         | 0         | 0        | 0        | 0        | 0        | 0        | 0        | 0        | 0        | 0        | 0        | 0        | 1         |            |
| Ethylbenzene dehydrogenase gamma subunit EbdC                                | toluene (anaerobic)          | 0        | 0        | 0        | 0        | 0        | 0         | 0        | 0        | 0         | 0         | 0        | 0        | 0        | 0         | 0         | 0        | 0        | 0        | 0        | 0        | 0        | 0        | 0        | 0        | 0        | 0        | 1         | 4          |
| Benzylsuccinate synthase alpha subunit BssA                                  | toluene (anaerobic)          | 0        | 0        | 0        | 0        | 0        | 0         | 0        | 0        | 0         | 0         | 0        | 0        | 0        | 0         | 0         | 0        | 0        | 0        | 0        | 0        | 0        | 0        | 0        | 0        | 0        | 0        | 2         |            |
| Benzylsuccinate synthase beta subunit BssB                                   | toluene (anaerobic)          | 0        | 0        | 0        | 0        | 0        | 0         | 0        | 0        | 0         | 0         | 0        | 0        | 0        | 0         | 0         | 0        | 0        | 0        | 0        | 0        | 0        | 0        | 0        | 0        | 0        | 0        | 1         |            |
| Benzylsuccinate synthase gamma subunit BssC                                  | toluene (anaerobic)          | 0        | 0        | 0        | 0        | 0        | 0         | 0        | 0        | 0         | 0         | 0        | 0        | 0        | 0         | 0         | 0        | 0        | 0        | 0        | 0        | 0        | 0        | 0        | 0        | 0        | 0        | 2         | 5          |
| <b>Sum</b>                                                                   |                              | <b>1</b> | <b>6</b> | <b>2</b> | <b>7</b> | <b>6</b> | <b>41</b> | <b>2</b> | <b>5</b> | <b>21</b> | <b>16</b> | <b>5</b> | <b>9</b> | <b>1</b> | <b>10</b> | <b>35</b> | <b>8</b> | <b>1</b> | <b>2</b> | <b>6</b> | <b>3</b> | <b>4</b> | <b>2</b> | <b>1</b> | <b>1</b> | <b>1</b> | <b>2</b> | <b>67</b> | <b>264</b> |
| Genes present (1) or absent (0)                                              | Alkanes                      | 1        | 1        | 1        | 1        | 1        | 0         | 1        | 1        | 1         | 1         | 1        | 1        | 1        | 1         | 1         | 1        | 1        | 1        | 0        | 0        | 1        | 1        | 0        | 0        | 1        | 1        | 22        |            |
| Genes present (1) or absent (0)                                              | PAHs                         | 0        | 0        | 0        | 0        | 1        | 1         | 0        | 1        | 0         | 0         | 0        | 0        | 0        | 1         | 0         | 0        | 0        | 0        | 0        | 0        | 0        | 0        | 0        | 0        | 0        | 0        | 1         | 5          |
| Genes present (1) or absent (0)                                              | Aromatic hydrocarbons        | 0        | 1        | 0        | 1        | 1        | 1         | 0        | 0        | 1         | 0         | 0        | 0        | 0        | 1         | 1         | 0        | 0        | 1        | 1        | 1        | 1        | 1        | 0        | 1        | 1        | 0        | 1         | 15         |

Bacteria bins are: Gammaproteobacteria (green), Alphaproteobacteria (yellow), Deltaproteobacteria (blue), Bacteroidetes (pink), and virus/unbinmed (grey).

Abbreviations: PAH dioxygenase L (large subunit); PAH dioxygenase S (small subunit).

\*PAH and aromatic dioxygenases with highest sequence identities.
